# Supplementary material for: Resolving the halogen vs. hydrogen bonding dichotomy in solutions: intermolecular complexes of trihalomethanes with halide and pseudohalide anions
Source: Royal Society of Chemistry journal article supplement (doi:10.1039/c8cp03505a), 2018-01-01
Supplement: c8cp03505a1.pdf [file c8cp03505a1.pdf]

## Supporting Information

*Brandon Watson, Olivia Grounds, William Borley, Sergiy V. Rosokha\**<sup>1</sup>

### **Resolving Halogen vs Hydrogen Bonding Dichotomy in Solutions: Intermolecular Complexes of Trihalomethanes with Halide and Pseudohalide Anions**

Department of Chemistry, Ball State University, Muncie, IN, USA, 47306

| <b>Table of Content</b>                                                                                                                                        | <b>Pages</b> |
|----------------------------------------------------------------------------------------------------------------------------------------------------------------|--------------|
| <b>A) UV-Vis and NMR measurements and their treatments</b>                                                                                                     |              |
| Details of the calculation of the equilibria constants and spectral characteristics                                                                            | S2-S5        |
| Results of the UV-Vis measurements of the formation of $[\text{CHI}_3, \text{A}^-]$ complexes and their initial treatment (Figures S1-S6)                      | S6-S11       |
| Jobs plot and Mulliken correlations (Figure S7, S8)                                                                                                            | S12          |
| Results of NMR measurements of the formation of $[\text{CHI}_3, \text{A}^-]$ complexes and their initial treatment (Figure S9)                                 | S13          |
| Results of UV-Vis measurements and NMR measurements of the formation of $[\text{CHBr}_3, \text{A}^-]$ complexes and their initial treatment (Figures S10, S11) | S14          |
| NMR measurements of the formation of $[\text{CHCl}_3, \text{A}^-]$ complexes and their initial treatment (Figure S12)                                          | S15          |
| Effective formation constants of $[\text{CHX}_3, \text{A}^-]$ complexes resulted from the initial treatments (Table S1)                                        | S16          |
| Simultaneous multivariable analysis of UV-Vis and NMR data (Figures S13-S19)                                                                                   | S17-S23      |
| Comparison of simultaneous and separate fittings of the UV-Vis and NMR data (Table S2)                                                                         | S24          |
| <b>B) Quantum-mechanical computations</b>                                                                                                                      |              |
| Structures of the calculated complexes (Figure S20)                                                                                                            | S26          |
| Energies of the XB and HB complexes (Table S3)                                                                                                                 | S27-S28      |
| Geometric characteristics of the calculated XB and HB complexes (Table S4)                                                                                     | S29          |
| Spectral characteristics of the calculated XB and HB complexes (Table S5)                                                                                      | S30          |
| Calculated normalized separations, extinction coefficient and optical transition in XB and HB complexes (Figures S21-23)                                       | S31          |
| Atomic coordinates of the calculated XB and HB complexes                                                                                                       | S32-35       |
| <b>C) X-ray crystallographic analysis</b>                                                                                                                      |              |
| Crystallographic parameters and the details of the structure refinements (Table S6)                                                                            | S36          |
| X-ray structures of halogen-bonded networks (Figure S24)                                                                                                       | S37          |
| Comparison of experimental and calculated halogen bond length (Table S7)                                                                                       | S37          |

<sup>1</sup> Corresponding author, e-mail: svrosokha@bsu.edu, phone: + 1-765-285-8615.

### Calculation of the equilibria constants

Formation constants of the XB and/or HB complexes  $[\text{CHX}_3, \text{A}^-]$  ( $\text{X} = \text{Cl}, \text{Br}, \text{I}, \text{A} = \text{Cl}, \text{Br}, \text{I}, \text{NCS}, \text{NCO}, \text{N}_3$ ) were established via UV-Vis and NMR measurements of the acetonitrile solutions containing constant concentrations (from 2 to 5 mM) of  $\text{CHX}_3$  and variable concentrations (from 0 to  $\sim 0.4\text{M}$ ) of tetrapropylammonium salts of (pseudo-)halide anions,  $\text{A}^-$ .<sup>2</sup> Several series of measurements were also done with  $n\text{-Bu}_4\text{NA}$  salts, and they afforded the same, within accuracy limit, formation constants as the corresponding measurements with  $\text{Pr}_4\text{NA}$ .<sup>3</sup> For the UV-Vis experiments, 10.0 mL of a stock solution of  $\text{CHX}_3$  (10.0 mM) and 5.00 mL of solution of  $\text{Pr}_4\text{NA}$  (from 0.4 M to 0.8 M) were typically prepared. Then, 0.500 mL of the stock solution of  $\text{CHX}_3$  were mixed in a microvolumetric (1.00 mL) flask with  $x$  mL of stock solution of  $\text{Pr}_4\text{NA}$  and  $(0.500-x)$  mL of acetonitrile (where  $x$  typically were 0.500, 0.400, 0.330, 0.250, 0.200, 0.160, 0.130, 0.100, 0.080, 0.065, 0.050, 0.035, 0.020 or similar numbers) using gas-tight microsyringes with capacities from 0.050 mL to 0.500 mL. UV-Vis measurements were carried out in acetonitrile at 22 °C using quartz (1-mm path length) spectroscopic cells on a CARY 500 spectrophotometer. A Dewar equipped with quartz lens was used for the measurements at +5 to -70 °C. The temperature was adjusted with an ethanol-liquid nitrogen bath ( $\pm 0.5$  K). Solutions of for the NMR measurements were prepared in a similar way. However, stock solutions of  $\text{CHX}_3$  (10.0 mM, 5.00 mL) and ( $\text{Pr}_4\text{NA}$  3 mL, from 0.4 M to 0.8 M) for NMR measurements were prepared in  $\text{CD}_3\text{CN}$  (containing internal TMS standard). Also, 0.250 mL of solution of  $\text{CHX}_3$  were mixed with  $x$  mL  $\text{Pr}_4\text{NA}$  and  $(0.250-x)$  mL of  $\text{CD}_3\text{CN}$ , so the total volumes of solutions for NMR measurements were 0.5 mL.  $^1\text{H}$  NMR measurements were performed on the 400 MHz NMR-ECZ400S spectrometer at 22 °C.

Alternatively, series of UV-Vis measurements were done by mixing 0.250 mL of the stock solution of  $\text{CHX}_3$  (prepared as described above) with 0.250 mL of the stock solution of  $\text{Pr}_4\text{NA}$  in Teflon-capped (1 mm) cuvettes equipped with sidearm. Separately, 5.0 mL of the stock solution of  $\text{CHX}_3$  was mixed with 5.0 mL of acetonitrile (so the concentration of the  $\text{CHX}_3$  in this solution was the same as that in the cuvette). After first spectrum was measured,  $x$  mL portions of the diluted solution of  $\text{CHX}_3$  (where  $x = 0.125, 0.150, 0.200, 0.250, 0.300, 0.400, 0.500, 0.600, 0.750, 0.900, 1.000, 1.500, 2.000$  or similar number) were added progressively and the spectra were measured after each addition. Thus, regardless of the method of preparation of solutions for the UV-Vis and NMR measurements, the concentrations of  $\text{CHX}_3$  were kept constant, and concentrations of  $\text{Pr}_4\text{NA}$  varied substantially in a series of measurements; and the values of formation constants derived from both types of the UV-Vis experiments were the same (within the accuracy limit).

<sup>2</sup> Specific concentration of  $\text{CHX}_3$  and  $\text{Pr}_4\text{NA}$  salts for different donor/acceptor pairs are listed in figure captures (see Figure 1, Figure S1 – S6, S9)

<sup>3</sup> Control experiments with tetrapropylammonium tetrafluoroborate verified that variation of concentration of this non-bonding anion in its mixtures with trihalomethanes in acetonitrile has negligible effects (as compared to that of pseudo-halide anions) on the chemical shifts of the  $\text{CHX}_3$  protons (see Figure 2).

The formation constants and spectral characteristics obtained (as in the earlier studies) assuming formation of only one type of complex represent average values from 3-5 series of UV-Vis or NMR experiments for each  $\text{CHX}_3/\text{A}^-$  pair. Each of such series typically included 8-10 points. UV-Vis absorption values measured at two wavelengths were normally used in the calculations. For the multivariable treatments of the UV and NMR data, the data from 2-3 series of measurements of each  $\text{CHX}_3/\text{A}^-$  pair (with the same concentration of trihalomethane) were combined and treated simultaneously.

Extinction coefficients  $\varepsilon$  for  $[\text{CHX}_3, \text{A}]$  complexes, limiting proton NMR shifts and equilibrium constants of their formation,  $K_{\text{UV}}^{\text{eff}}$  and  $K_{\text{NMR}}^{\text{eff}}$ , (Table 1 and Table S1) were first calculated via the Benesi-Hildebrand procedure and, additionally, via regression analysis. These treatments were based, as in the previous studies, on the assumption that only one type (either XB or HB) of 1:1 complex is formed in solution, i.e. that the formation of other types of complexes can be neglected:

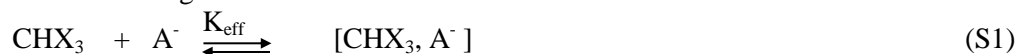

The effective formation constant of the complex is expressed as

$$K_{\text{eff}} = C_{\text{com}} / ((C_{\text{D}}^0 - C_{\text{com}})(C_{\text{A}}^0 - C_{\text{com}})) \quad (\text{S2})$$

where  $C_{\text{com}}$  is the concentration of the complex, and  $C_{\text{D}}^0$  and  $C_{\text{A}}^0$  are initial concentrations of  $\text{CHX}_3$  and  $\text{A}^-$ , respectively. When  $C_{\text{A}}^0 \gg C_{\text{D}}^0$ ,  $C_{\text{A}}^0 - C_{\text{com}} \approx C_{\text{A}}^0$ . Therefore  $K_{\text{eff}} = C_{\text{com}} / ((C_{\text{D}}^0 - C_{\text{com}})C_{\text{A}}^0)$ . Thus,

$$K_{\text{eff}}(C_{\text{D}}^0 - C_{\text{com}})C_{\text{A}}^0 - C_{\text{com}} = 0 \quad (\text{S3})$$

$$\text{Or} \quad C_{\text{com}} = K_{\text{eff}}C_{\text{D}}^0C_{\text{A}}^0 / (K_{\text{eff}}C_{\text{D}}^0 + 1) \quad (\text{S4})$$

Taking into account that:  $\Delta \text{Abs} = \varepsilon l C_{\text{com}}$ , where  $\Delta \text{Abs}$  is the absorbance of the complex at certain wavelength (obtained by subtraction of the absorption of components), and  $l$  is the length of the spectrophotometric cell, the latter can be rearranged as the Benesi-Hildebrand equation:

$$C_{\text{D}}^0 / \Delta \text{Abs} = 1/(\varepsilon l) + \{1/ (K_{\text{UV}}^{\text{eff}} \varepsilon l)\} \times 1/[C_{\text{A}}^0] \quad (\text{S5})$$

The Benesi-Hildebrand treatments of the UV-Vis absorption data are illustrated below in Figures S1C-S6C. It should be noted that the Benesi-Hildebrand procedure provided reliable results only if one reactant is present in a great excess and the complexation of the other reactant (in deficit) is in the 20-80% range (which is difficult to obtain with  $K$  values of  $\sim 1$  or less due to solubility limitations). Thus, to verify the values of  $K_{\text{UV}}^{\text{eff}}$  and  $\varepsilon$ , as well as to determine  $K_{\text{NMR}}^{\text{eff}}$  and  $\Delta \delta_{\infty}$ , we carried out regression analysis of the UV-Vis and NMR data without assumptions made in the Benesi-Hildebrand method. In this case, solving equation S2 leads to:

$$C_{\text{com}} = (C_{\text{A}}^0 + C_{\text{D}}^0 + 1/K_{\text{eff}}) \pm \{((C_{\text{A}}^0 + C_{\text{D}}^0 + 1/K_{\text{eff}})^2 - 4C_{\text{A}}^0C_{\text{D}}^0)^{0.5}\} / 2 \quad (\text{S6})$$

So, changes in the UV-Vis absorption intensity and shift of the proton signal can be expressed as:

$$\Delta \text{Abs} = \varepsilon l C_{\text{com}} = \varepsilon l \times \{ (C_{\text{A}}^0 + C_{\text{D}}^0 + 1/K_{\text{eff}}) - ((C_{\text{A}}^0 + C_{\text{D}}^0 + 1/K_{\text{eff}})^2 - 4C_{\text{A}}^0C_{\text{D}}^0)^{0.5} \} / 2 \quad (\text{S7})$$

$$\Delta \delta = \Delta \delta_{\infty} C_{\text{com}} / C_{\text{D}}^0 = (\Delta \delta_{\infty} / C_{\text{D}}^0) \times \{ (C_{\text{A}}^0 + C_{\text{D}}^0 + 1/K_{\text{eff}}) - ((C_{\text{A}}^0 + C_{\text{D}}^0 + 1/K_{\text{eff}})^2 - 4C_{\text{A}}^0C_{\text{D}}^0)^{0.5} \} / 2 \quad (\text{S8})$$

where  $\epsilon$  and  $l$  are extinction coefficient of the complex and the length of the cell which was used in the UV-Vis measurements, and  $\Delta\delta_\infty = \delta_\infty - \delta_0$  is the difference between the ppm of the  $\text{CHX}_3$  proton in the presence of the infinite concentration of anion,  $\delta_\infty$  (i.e. when all  $\text{CHX}_3$  molecules are bonded to anions) and that of the separate  $\text{CHX}_3$ ,  $\delta_0$ . The fitting of the results of the UV-Vis titrations to eqs S7 (with  $\epsilon$  and  $K_{\text{UV}}^{\text{eff}}$  as the adjustable parameters) using the Origin Pro 2016 are illustrated in Figures S1D-S6D. They produced values of  $K_{\text{UV}}^{\text{eff}}$  and  $\epsilon$  in Table S1. (These values were consistent with those obtained via the Benesi-Hildebrandt treatment). The fitting of the results of NMR experiments (with  $K_{\text{NMR}}^{\text{eff}}$  and  $\Delta\delta_\infty$  as adjustable parameters) are illustrated in Figures S9 – S11. They produced the values of  $K_{\text{NMR}}^{\text{eff}}$  and  $\Delta\delta_\infty$  in Table S1.

The spectral and computational data indicated, however, that interaction of trihalomethanes with nucleophile  $\text{A}^-$  resulted in formation of both XB and HB complexes. These processes are characterized by equilibria constants  $K_{\text{XB}}$  and  $K_{\text{HB}}$ , respectively (eqs S9 and S10):

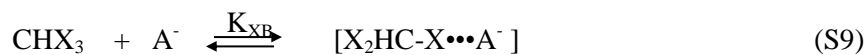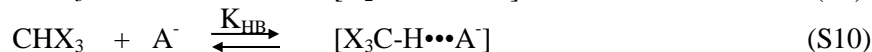

Analysis of the experimental data pointed out that interaction of trihalomethanes with anions produces under conditions of experiments predominantly 1:1 complexes (either XB or HB).<sup>4</sup> Their formation constants of the latter are expressed as:

$$K_{\text{XB}} = C_{\text{XB}} / ((C_{\text{D}}^0 - C_{\text{XB}} - C_{\text{HB}})(C_{\text{A}}^0 - C_{\text{XB}} - C_{\text{HB}})) \quad (\text{S11})$$

$$K_{\text{HB}} = C_{\text{HB}} / ((C_{\text{D}}^0 - C_{\text{XB}} - C_{\text{HB}})(C_{\text{A}}^0 - C_{\text{XB}} - C_{\text{HB}})) \quad (\text{S12})$$

where  $C_{\text{XB}}$  and  $C_{\text{HB}}$  are equilibria concentrations of the XB and HB complexes. Eqs S11 and S12 can be rearranged as:

$$K_{\text{XB}}((C_{\text{D}}^0 - C_{\text{XB}} - C_{\text{HB}})(C_{\text{A}}^0 - C_{\text{XB}} - C_{\text{HB}})) = C_{\text{XB}} \quad (\text{S13})$$

$$K_{\text{HB}}((C_{\text{D}}^0 - C_{\text{XB}} - C_{\text{HB}})(C_{\text{A}}^0 - C_{\text{XB}} - C_{\text{HB}})) = C_{\text{HB}} \quad (\text{S14})$$

Thus  $(C_{\text{D}}^0 - C_{\text{XB}} - C_{\text{HB}})(C_{\text{A}}^0 - C_{\text{XB}} - C_{\text{HB}}) = C_{\text{XB}}/K_{\text{XB}} \quad (\text{S15})$

$$(C_{\text{D}}^0 - C_{\text{XB}} - C_{\text{HB}})(C_{\text{A}}^0 - C_{\text{XB}} - C_{\text{HB}}) = C_{\text{HB}}/K_{\text{HB}} \quad (\text{S16})$$

Or  $C_{\text{HB}} / K_{\text{HB}} = C_{\text{XB}} / K_{\text{XB}} \quad (\text{S17})$

$$C_{\text{XB}} = K_{\text{XB}} C_{\text{HB}} / K_{\text{HB}} \quad (\text{S18})$$

<sup>4</sup> This conclusion is based on the observation that the Jobs plot (for both  $\text{CHI}_3$  in the current work and  $\text{CHBr}_3$  in the reported earlier data) shows the formation of 1:1 complex. Apparently, polarization of the  $\text{CHX}_3$  molecule hinders the binding of the second anion (and this applies to both modes of interaction). Moreover, the fitting of the experimental data using the model in which XB and HB modes do not affect each other, i.e.  $C_{\text{XB}} = K_{\text{XB}} \times (C_{\text{D}}^0 - C_{\text{XB}})(C_{\text{A}}^0 - C_{\text{XB}})$  and  $C_{\text{HB}} = K_{\text{HB}} \times (C_{\text{D}}^0 - C_{\text{HB}})(C_{\text{A}}^0 - C_{\text{HB}})$  either failed to converge or produced unsatisfactory results (see Figure S12). Finally, the calculated free energies of formation of the triple  $[\text{A}^-\cdots\text{HCX}_3\cdots\text{A}^-]$  complexes (in which one anion is XB bonded and another is HB bonded to the same  $\text{CHX}_3$  molecule) were  $\sim 6$  kcal/mol more positive than that of the XB or HB dyads. So, the ratio of concentrations of triple to double complexes  $C_{\text{T}}/C_{\text{D}} = (K_{\text{T}} \times C_{\text{D}} \times C_{\text{A}}^2) / (K_{\text{D}} \times C_{\text{D}} \times C_{\text{A}}) = \exp(-\Delta\Delta G/RT) \times C_{\text{A}}$  (where  $K_{\text{T}}$  is a formation constant of the triple complex, and  $K_{\text{D}}$  is a formation constant of the XB or HB complex, and  $\Delta\Delta G$  is the difference between free energies of their formations). Since  $C_{\text{A}} < 1$  M and  $\exp(-\Delta\Delta G/RT) \approx \exp(-6/0.6) \approx 4.5 \times 10^{-5}$ , the  $C_{\text{T}} < C_{\text{D}} \times 10^{-4}$  and can thus formation of triple complexes can be neglected.

$$C_{HB} = K_{HB}C_{XB}/K_{XB} \quad (S19)$$

substitution of  $C_{HB}$  in eq S15 (using eq S19) and rearrangements leads to the quadratic equation:

$$(C_D^o - C_{XB}(1 + K_{HB}/K_{XB}))(C_A^o - C_{XB}(1 + K_{HB}/K_{XB})) - C_{XB}/K_{XB} = 0 \quad (S20)$$

$$C_A^o C_D^o / (1 + K_{HB}/K_{XB}) - C_{XB} (C_A^o + C_D^o + 1/(K_{XB} + K_{HB})) + C_{XB}^2 (1 + K_{HB}/K_{XB}) = 0 \quad (S21)$$

Thus:

$$C_{XB} = \{ (C_A^o + C_D^o + 1/(K_{XB} + K_{HB})) - ((C_A^o + C_D^o + 1/(K_{XB} + K_{HB}))^2 - 4C_A^o C_D^o)^{0.5} \} / (2(1 + K_{HB}/K_{XB})) \quad (S22)$$

In a similar way:

$$C_{HB} = \{ (C_A^o + C_D^o + 1/(K_{XB} + K_{HB})) - ((C_A^o + C_D^o + 1/(K_{XB} + K_{HB}))^2 - 4C_A^o C_D^o)^{0.5} \} / (2(1 + K_{XB}/K_{HB})) \quad (S23)$$

As such,  $\Delta Abs = \epsilon l \times C_{XB} =$

$$= \epsilon l \times \{ (C_A^o + C_D^o + 1/(K_{XB} + K_{HB})) - ((C_A^o + C_D^o + 1/(K_{XB} + K_{HB}))^2 - 4C_A^o C_D^o)^{0.5} \} / (2(1 + K_{HB}/K_{XB})) \quad (S24)$$

$$\Delta \delta = \Delta \delta_{XB}/C_D^o \times C_{XB} + \Delta \delta_{HB}/C_D^o \times C_{HB} =$$

$$= \Delta \delta_{XB}/C_D^o \times \{ (C_A^o + C_D^o + 1/(K_{XB} + K_{HB})) - ((C_A^o + C_D^o + 1/(K_{XB} + K_{HB}))^2 - 4C_A^o C_D^o)^{0.5} \} / (2(1 + K_{HB}/K_{XB})) \\ + \Delta \delta_{HB}/C_D^o \times \{ (C_A^o + C_D^o + 1/(K_{XB} + K_{HB})) - ((C_A^o + C_D^o + 1/(K_{XB} + K_{HB}))^2 - 4C_A^o C_D^o)^{0.5} \} / (2(1 + K_{XB}/K_{HB})) \quad (S25)$$

Simultaneous fitting of the dependencies of  $\Delta Abs$  and  $\Delta \delta$  on concentration of  $A^-$  using eqs S24 and S25

(multivariable non-linear fitting option in Origin Pro 2016) are illustrated in Figures S13 – S19 (Table S4).<sup>5</sup> In

these fitting, the concentration of anion  $[A^-]$  was independent variable, values of  $\Delta Abs$  and  $\Delta \delta$  were two

dependent variables,  $K_{HB}$ ,  $K_{XB}$  and  $\epsilon$  were adjustable parameters, and  $\Delta \delta_{XB}$  and  $\Delta \delta_{HB}$  (taken from

computations) and concentration of  $CHX_3$  were constant. Such fittings produced values of  $K_{XB}$  and  $K_{HB}$ .

It should be noted that the dependences of the values of  $\Delta Abs$  and  $\Delta \delta$  on concentration of anions in eqs S24 and S25 are similar to that in eqs S7 and S8 (although the  $K_{eff}$  in eqs S7 and S8 are replaced by combinations of  $K_{HB}$  and  $K_{XB}$  in eqs 21 and 22). This similarity explains the fact that the spectral data apparently could be fitted using eqs S7 and S8. However, the values of the formation constants of the dominant (XB or HB) complex resulting from such fitting may differ substantially from the correct value, and formation of the less stable complex can be overlooked.

<sup>5</sup> The simultaneous fitting of the dependencies of  $\Delta Abs$  and  $\Delta \delta$  on  $C_A^o$  (at constant  $C_D^o$ ) with five adjustable parameters ( $K_{HB}$ ,  $K_{XB}$ ,  $\Delta \delta_{XB}$ ,  $\Delta \delta_{HB}$  and  $\epsilon$ ) produced unreliable results with the standard errors higher than 100%.

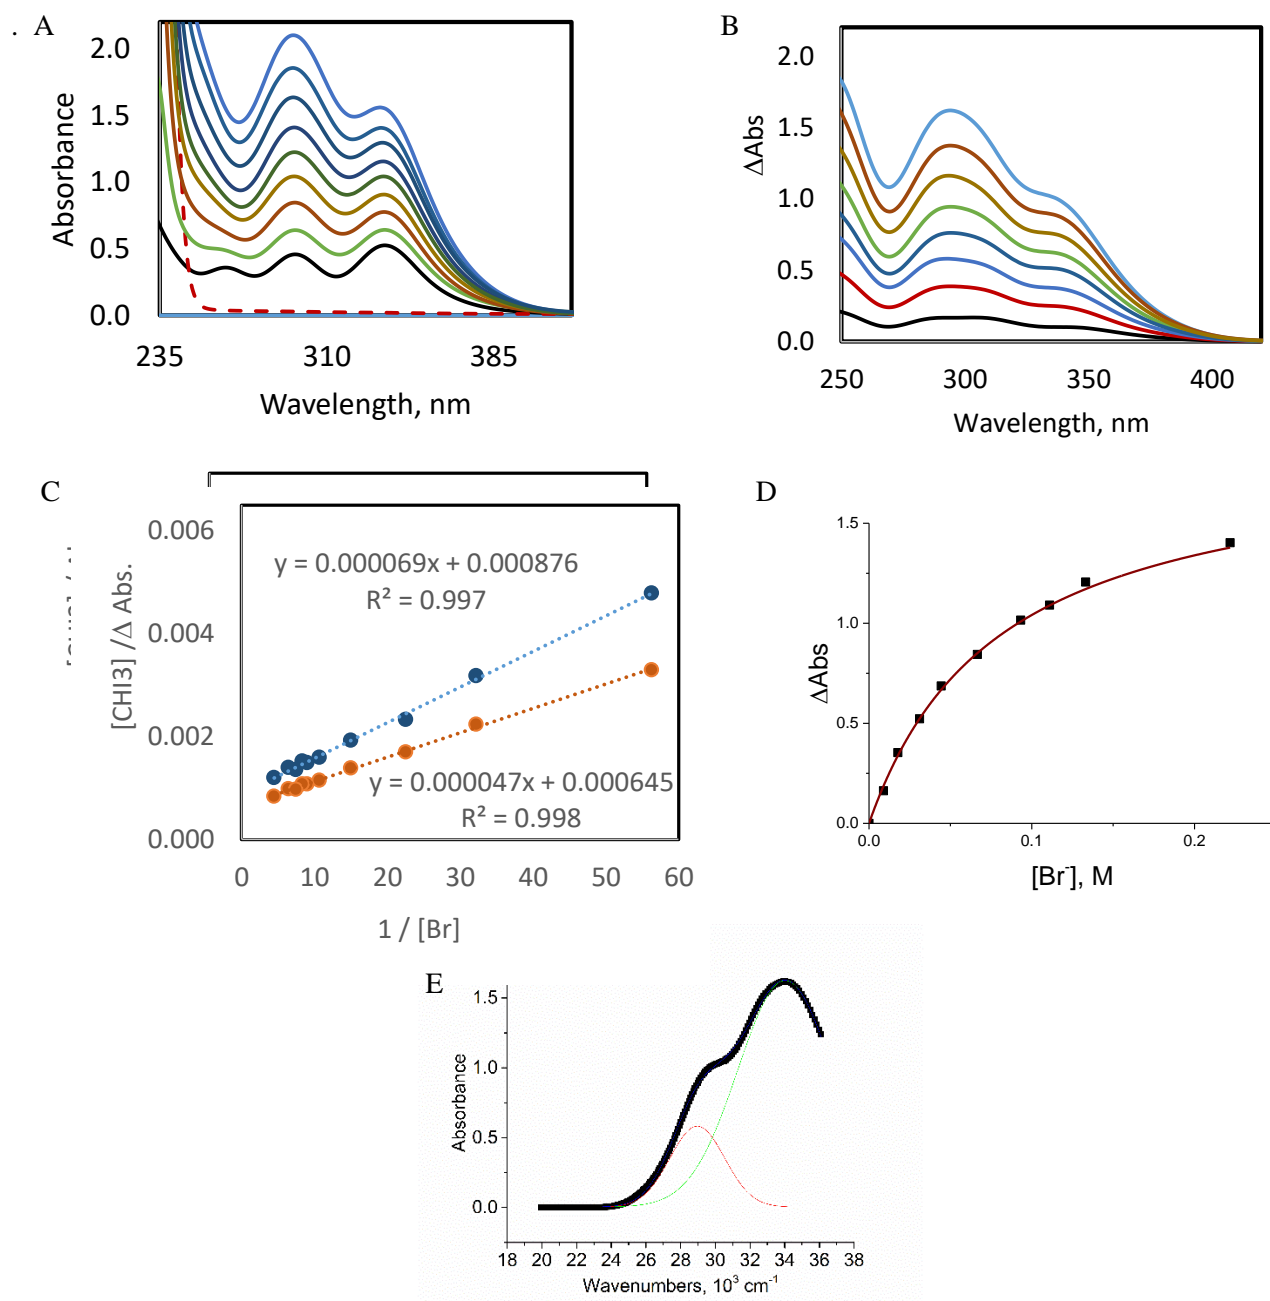

**Figure S1.** A) UV-Vis spectra of solutions with constants concentration of  $\text{CHI}_3$  (1.1 mM) and various concentrations of  $\text{Pr}_4\text{NBr}$  salt in acetonitrile. The solid black line and dashed red line represent spectra of solutions of individual  $\text{CHI}_3$  (1.1 mM) and  $\text{Pr}_4\text{NBr}$  (222 mM), respectively. Concentration of  $\text{Pr}_4\text{NBr}$  (solid lines, from bottom to top): 0 mM, 8.8 mM, 17.8 mM, 31.0 mM, 44.4 mM, 66.6 mM, 93.2 mM, 119.8 mM, and 133.1 mM. B) Differential absorption spectra obtained by subtraction of the absorption of components from the spectra of the mixtures representing absorption spectra of the  $[\text{CHI}_3, \text{Br}^-]$  complexes. C) Benesi-Hildebrand treatment of absorption data. D) Fitting of the  $\Delta \text{Abs}$  to eq S7 (i.e. assuming one complex formation). E) Deconvolution of the absorption of the  $[\text{CHI}_3, \text{Br}^-]$  complex into Gaussian components.

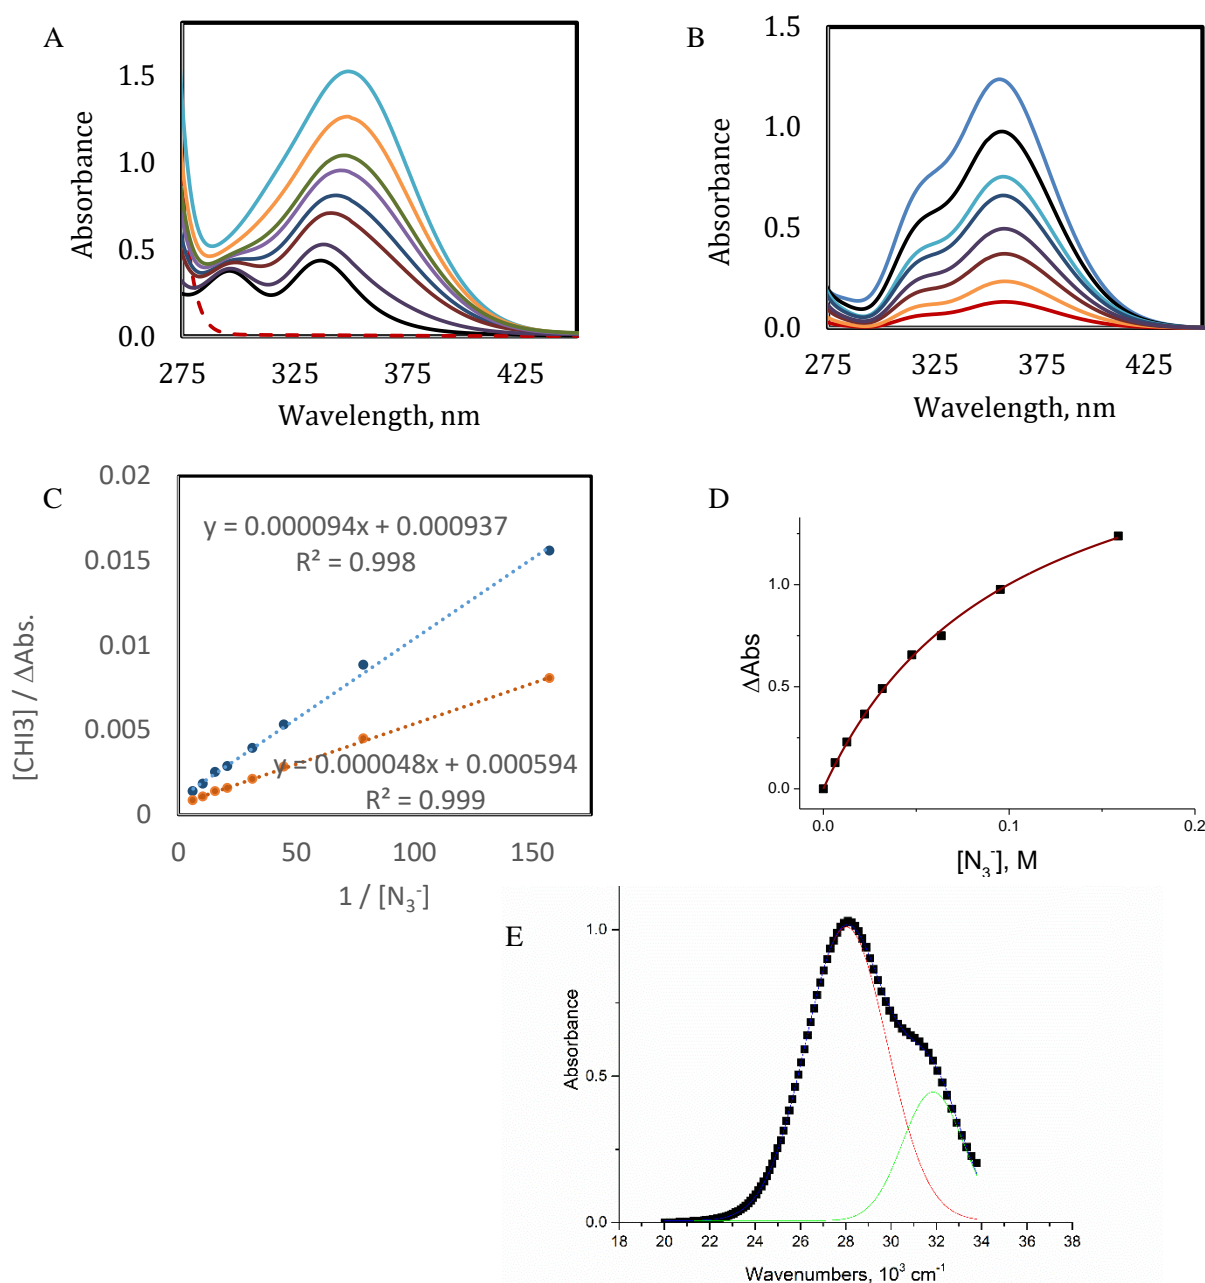

**Figure S2.** A) UV-Vis spectra of solutions with constants concentration of  $\text{CHI}_3$  (1.1 mM) and various concentrations of  $\text{Pr}_4\text{NN}_3$  salt in acetonitrile. The solid black line and dashed red line represent spectra of solutions of individual  $\text{CHI}_3$  (1.1 mM) and  $\text{Pr}_4\text{NBr}$  (249 mM), respectively. Concentration of  $\text{Pr}_4\text{NN}_3$  (solid lines, from bottom to top): 0 mM, 6.4 mM, 22.2 mM, 31.8 mM, 47.6 mM, 63.5 mM, 95.3 mM, and 158.8 mM. B) Differential absorption spectra obtained by subtraction of the absorption of components from the spectra of the mixtures representing absorption spectra of the  $[\text{CHI}_3, \text{N}_3^-]$  complexes. C) Benesi-Hildebrand treatment of absorption data. D) Fitting of the  $\Delta\text{Abs}$  to eq S7 (i.e. assuming one complex formation). E) Deconvolution of the absorption of the  $[\text{CHI}_3, \text{N}_3^-]$  complex into Gaussian components.

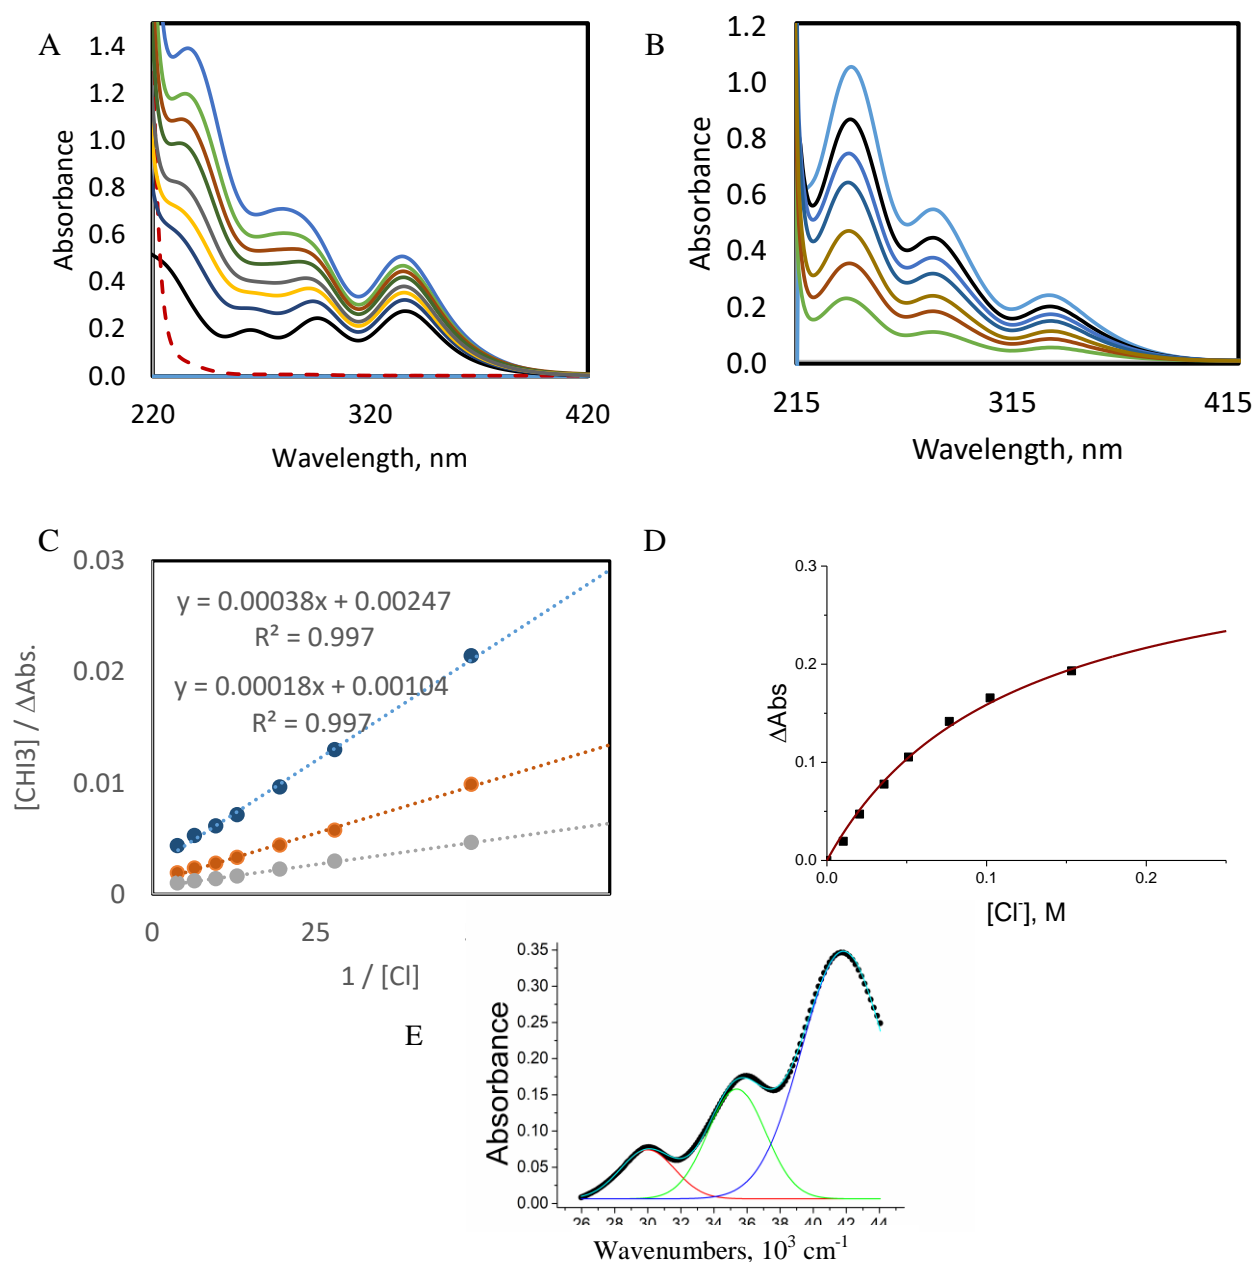

**Figure S3.** A) UV-Vis spectra of solutions with constants concentration of  $\text{CHI}_3$  (1.1 mM) and various concentrations of  $\text{Pr}_4\text{NCl}$  salt in acetonitrile. The solid black line and dashed red line represent spectra of solutions of individual  $\text{CHI}_3$  (1.1 mM) and  $\text{Pr}_4\text{NCl}$  (255 mM), respectively. Concentration of  $\text{Cl}^-$  (solid lines, from bottom to top): 0 mM, 10 mM, 20 mM, 36 mM, 51 mM, 77 mM, 102 mM, 153 mM, and 255 mM. B) Differential absorption spectra obtained by subtraction of the absorption of components from the spectra of the mixtures representing absorption spectra of the  $[\text{CHI}_3, \text{Cl}^-]$  complexes. C) Benesi-Hildebrand treatment of absorption data. D) Fitting of the  $\Delta\text{Abs}$  to eq S7 (i.e. assuming one complex formation). E) Deconvolution of the absorption of the  $[\text{CHI}_3, \text{Cl}^-]$  complex into Gaussian components.



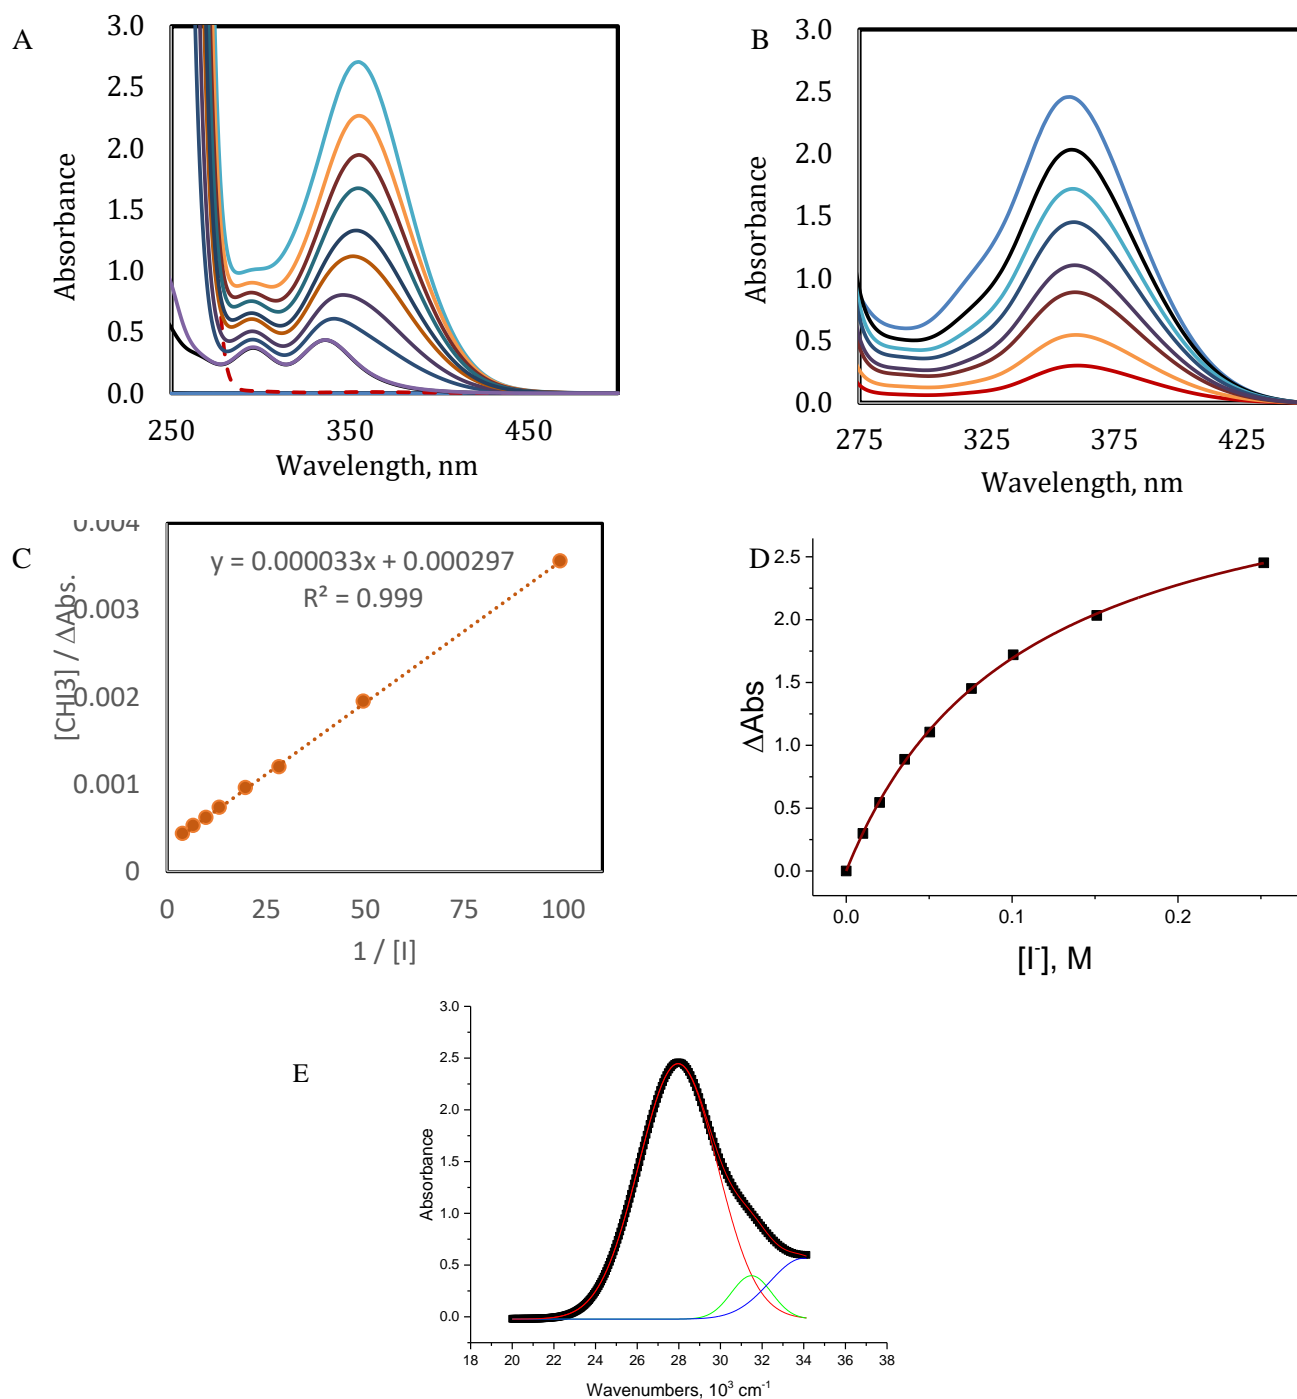

**Figure S4.** A) UV-Vis spectra of solutions with constants concentration of  $\text{CHI}_3$  (1.1 mM) and various concentrations of  $\text{Pr}_4\text{NI}$  salt in acetonitrile. The solid black line and dashed red line represent spectra of solutions of individual  $\text{CHI}_3$  (1.1 mM) and  $\text{Pr}_4\text{NI}$  (252 mM), respectively. Concentration of  $\text{I}^-$  (solid lines, from bottom to top): 0 mM, 10.1 mM, 35.2 mM, 50.4 mM, 75.5 mM, 100.7 mM, 151.1 mM, and 251.8 mM. B) Differential absorption spectra obtained by subtraction of the absorption of components from the spectra of the mixtures representing absorption spectra of the  $[\text{CHI}_3, \text{I}]$  complexes. C) Benesi-Hildebrand treatment of absorption data. D) Fitting of the  $\Delta\text{Abs}$  to eq S7 (i.e. assuming one complex formation). E) Deconvolution of the absorption of the  $[\text{CHI}_3, \text{I}]$  complex into Gaussian components.

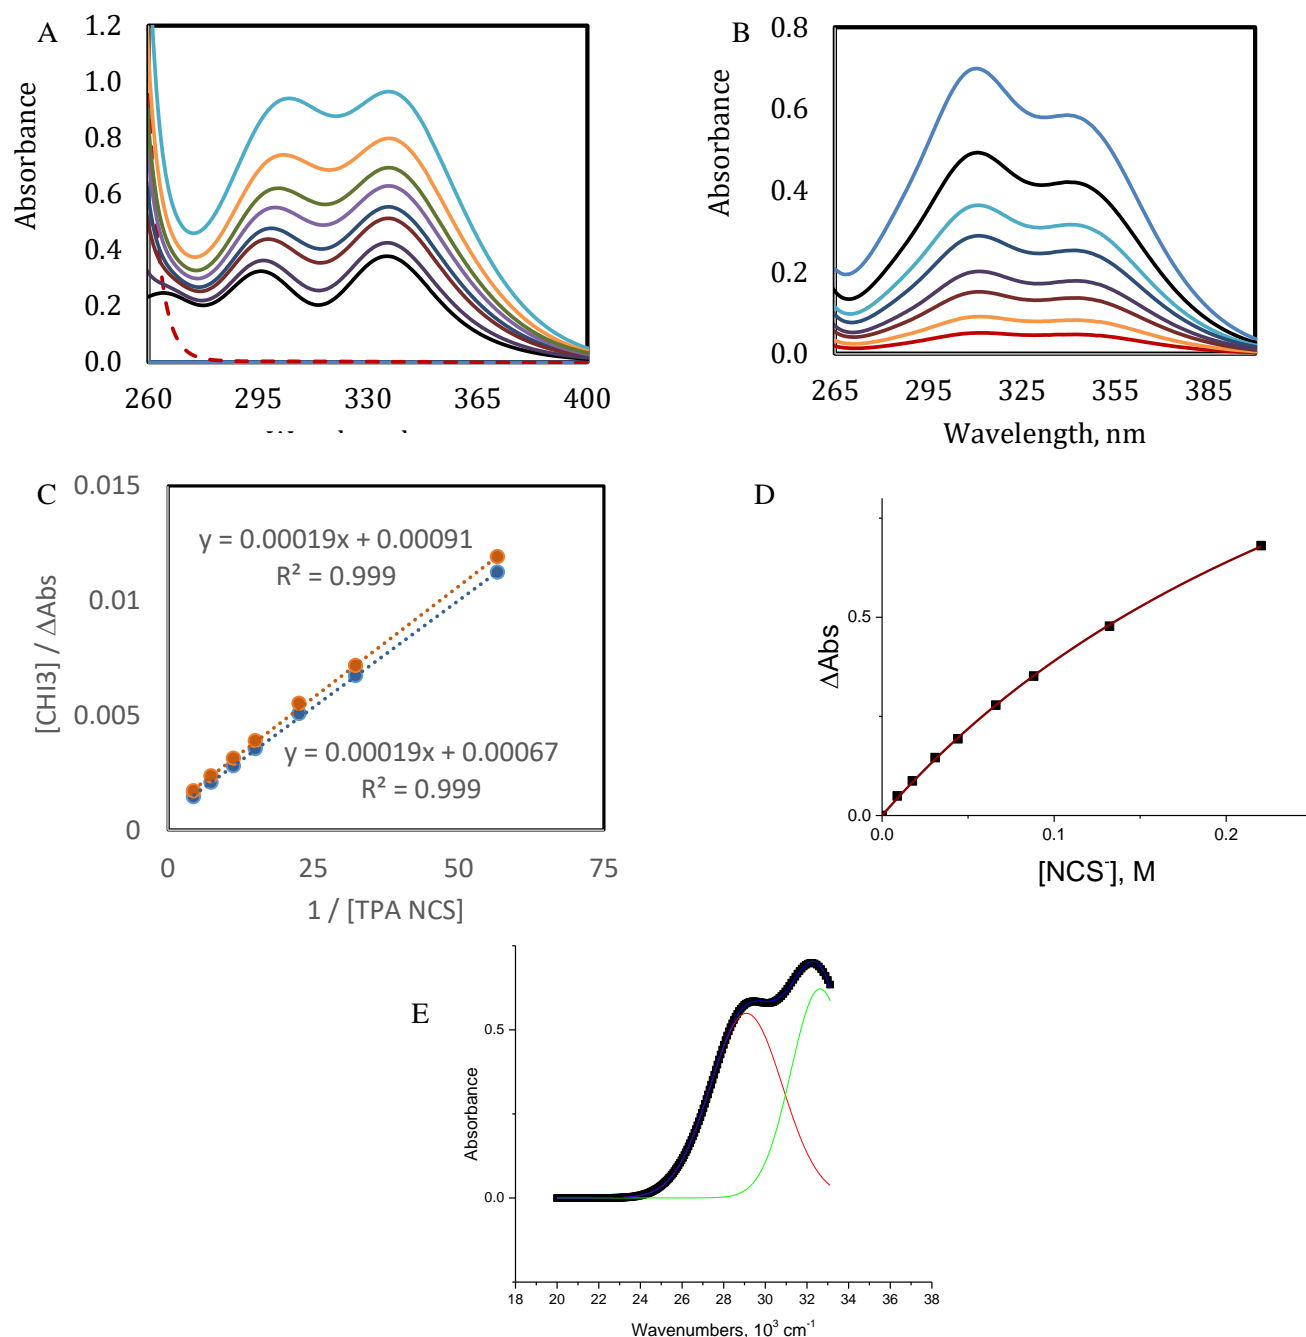

**Figure S5.** A) UV-Vis spectra of solutions with constants concentration of  $\text{CHI}_3$  (1.1 mM) and various concentrations of  $\text{Pr}_4\text{NNCS}$  salt in acetonitrile. The solid black line and dashed red line represent spectra of solutions of individual  $\text{CHI}_3$  (1.1 mM) and  $\text{Pr}_4\text{NNCS}$  (255 mM), respectively. Concentration of  $\text{NCS}^-$  (solid lines, from bottom to top): 0 mM, 8.8 mM, 17.6 mM, 30.8 mM, 44.1 mM, 66.1 mM, 132.2 mM, and 220.3 mM. B) Differential absorption spectra obtained by subtraction of the absorption of components from the spectra of the mixtures representing absorption spectra of the  $[\text{CHI}_3, \text{NCS}]$  complexes. C) Benesi-Hildebrand treatment of absorption data. D) Fitting of the  $\Delta\text{Abs}$  to eq S7 (i.e. assuming one complex formation). E) Deconvolution of the absorption of the  $[\text{CHI}_3, \text{NCS}]$  complex into Gaussian components.

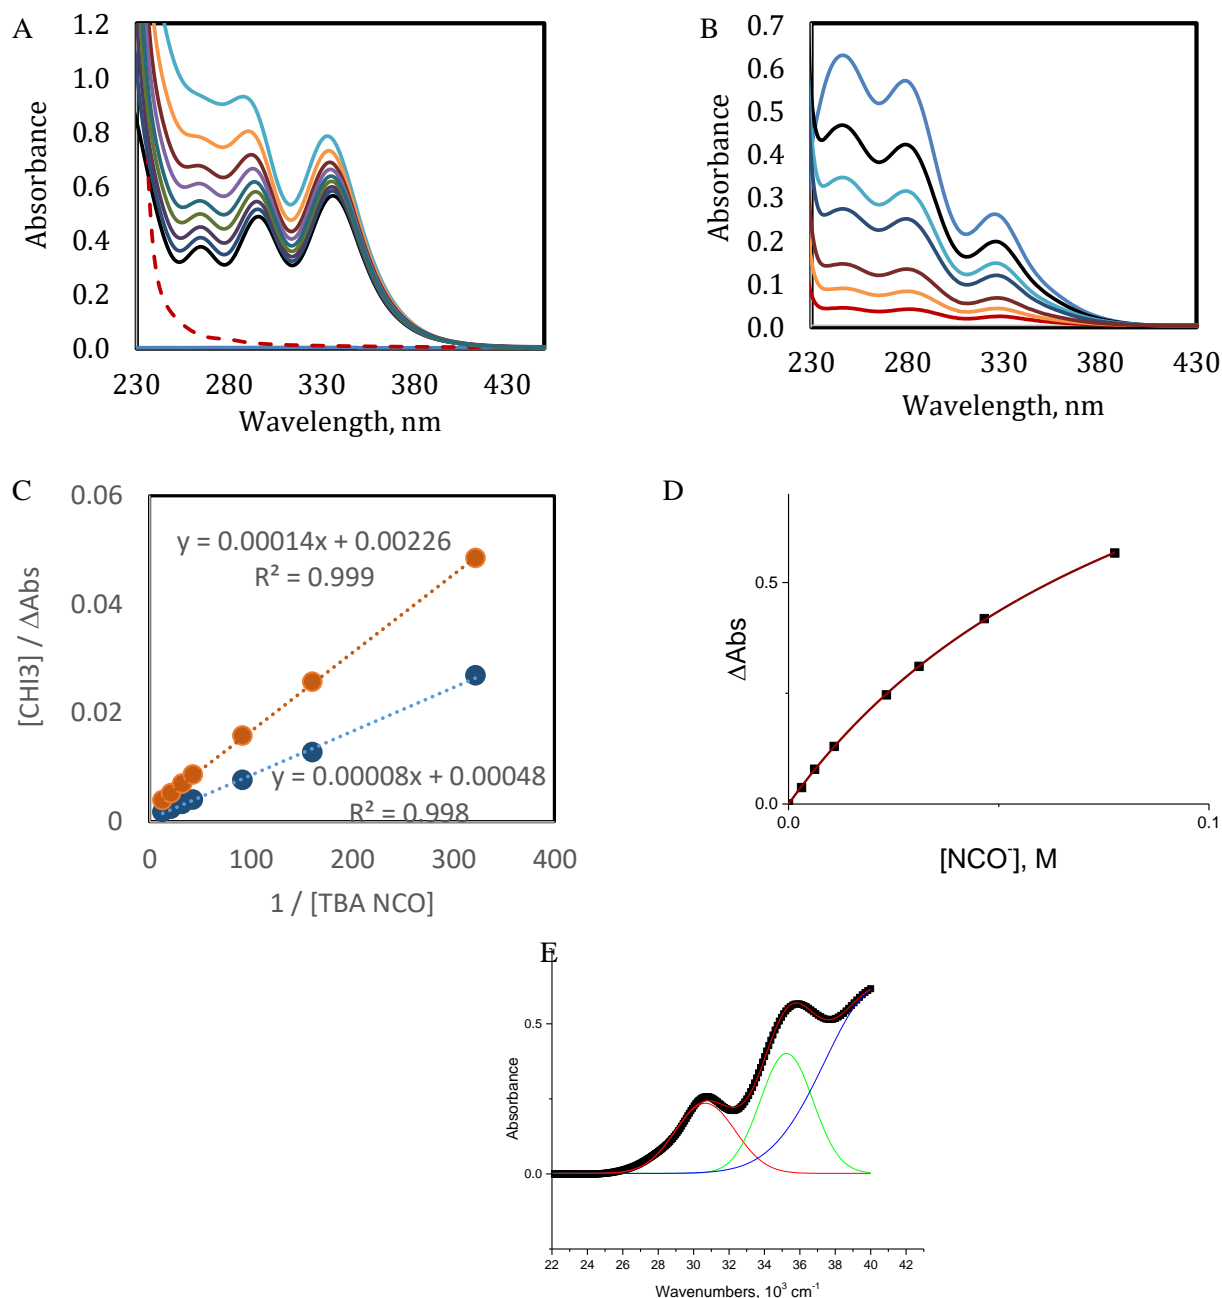

**Figure S6.** A) UV-Vis spectra of solutions with constants concentration of  $\text{CHI}_3$  (1.1 mM) and various concentrations of  $\text{Bu}_4\text{NNCO}$  salt in acetonitrile. The solid black line and dashed red line represent spectra of solutions of individual  $\text{CHI}_3$  (1.1 mM) and  $\text{Bu}_4\text{NNCO}$  (249 mM), respectively. Concentration of  $\text{Bu}_4\text{NNCO}$  (solid lines, from bottom to top): 0 mM, 3.1 mM, 6.2 mM, 10.9 mM, 15.5 mM, 23.3 mM, 31.1 mM, 46.6 mM and 77.6 mM. B) Differential absorption spectra obtained by subtraction of the absorption of components from the spectra of the mixtures representing absorption spectra of the  $[\text{CHI}_3, \text{NCO}]$  complexes. C) Benesi-Hildebrand treatment of absorption data. D) Fitting of the  $\Delta\text{Abs}$  to eq S7 (i.e. assuming one complex formation). E) Deconvolution of the absorption of the  $[\text{CHI}_3, \text{NCO}]$  complex into Gaussian components.

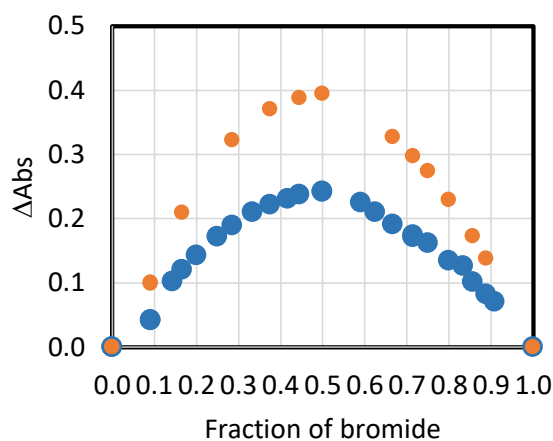

**Figure S7.** Job's plot: dependence of  $\Delta\text{Abs}$  on the molar fraction of bromide for the solution containing  $\text{CHI}_3$  and  $\text{Br}^-$  with constant sum of the concentration of components (20 mM) on fraction of  $\text{Br}^-$  (taken as a salt with  $\text{Pr}_4\text{N}^+$  counter-ion). Blue and orange points show absorption measured at  $\lambda = 340$  nm and  $\lambda = 296$  nm, respectively.

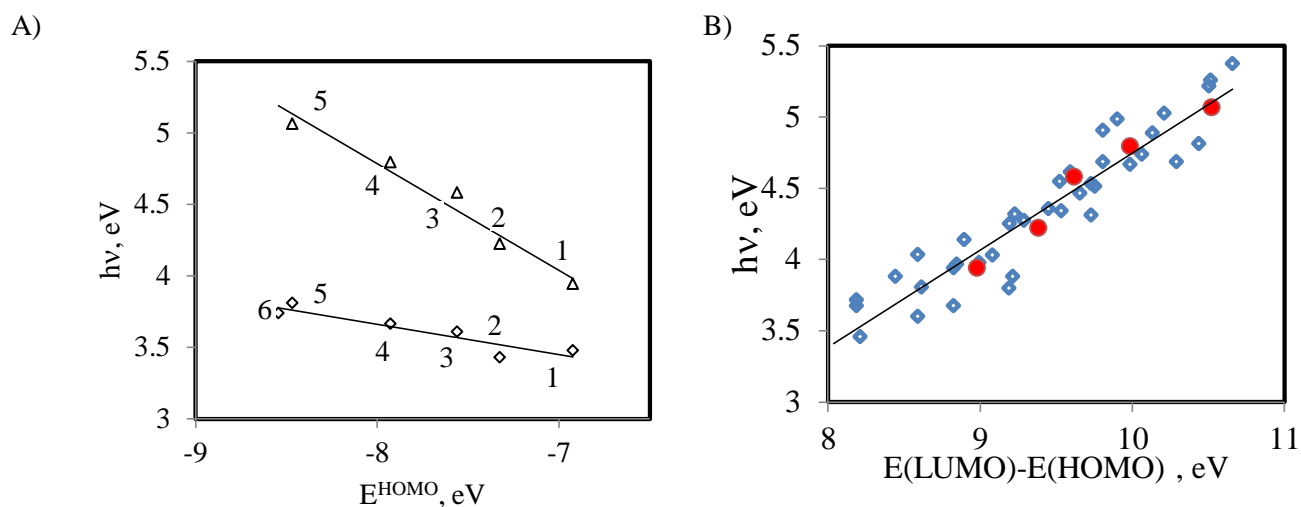

**Figure S8.** (A) Correlation between the energies of the absorption bands of the  $[\text{CHX}_3, \text{A}^-]$  complexes ( $\text{CHI}_3$  ( $\diamond$ ) or  $\text{CHBr}_3$  ( $\Delta$ )) and the HOMO energies of  $\text{A}^-$  anions:  $\text{N}_3^-$  (1),  $\text{I}^-$  (2),  $\text{NCS}^-$  (3),  $\text{Br}^-$  (4),  $\text{NCO}^-$  (5),  $\text{Cl}^-$  (6)). (B) Mulliken correlation between the energies of the lowest-energy bands of the complexes of bromosubstituted electrophiles and anions,  $[\text{R-Br}, \text{A}^-]$  and the difference of their frontier orbital energies. Complexes of  $\text{CHBr}_3$  are shown as red circles. HOMO/LUMO energies (from mp2/6-311G\*\*/SCIPCM computations) and wavelengths are listed below (from refs 50- 52).

| R-Br                              | E(LUMO) | $\text{Br}^-$ | $\text{Cl}^-$ | $\text{I}^-$ | $\text{NCS}^-$ | $\text{NCO}^-$ | $\text{N}_3^-$ |
|-----------------------------------|---------|---------------|---------------|--------------|----------------|----------------|----------------|
| $\text{CBr}_4$                    | 0.04652 | 292           | 265           | 345          | 315            | 274            | 338            |
| $\text{CHBr}_3$                   | 0.07564 | 259           |               | 294          | 275            | 245            | 315            |
| $\text{CBr}_3\text{NO}_2$         | 0.04731 | 320           | 297           |              |                | 275            | 359            |
| $\text{CBr}_3\text{CN}$           | 0.05593 | 285           | 262           | 327          | 308            | 266            | 320            |
| $\text{CBr}_3\text{COOH}$         | 0.07215 | 289           | 238           | 300          | 273            |                | 297            |
| $\text{CFBr}_3$                   | 0.0613  | 269           | 247           | 312          | 287            | 254            | 308            |
| $\text{CBr}_3\text{CONH}_2$       | 0.07255 | 249           | 236           |              | 286            | 258            | 300            |
| $\text{C}_3\text{Br}_2\text{F}_6$ | 0.10039 | 231           |               |              | 265            |                | 278            |
| $\text{CBr}_3\text{COCBr}_3$      | 0.0465  | 327           | 253           |              | 338            | 288            | 334            |
| $E(\text{HOMO})$                  |         | -0.29131      | -0.31396      | -0.26925     | -0.27785       | -0.31113       | -0.25444       |

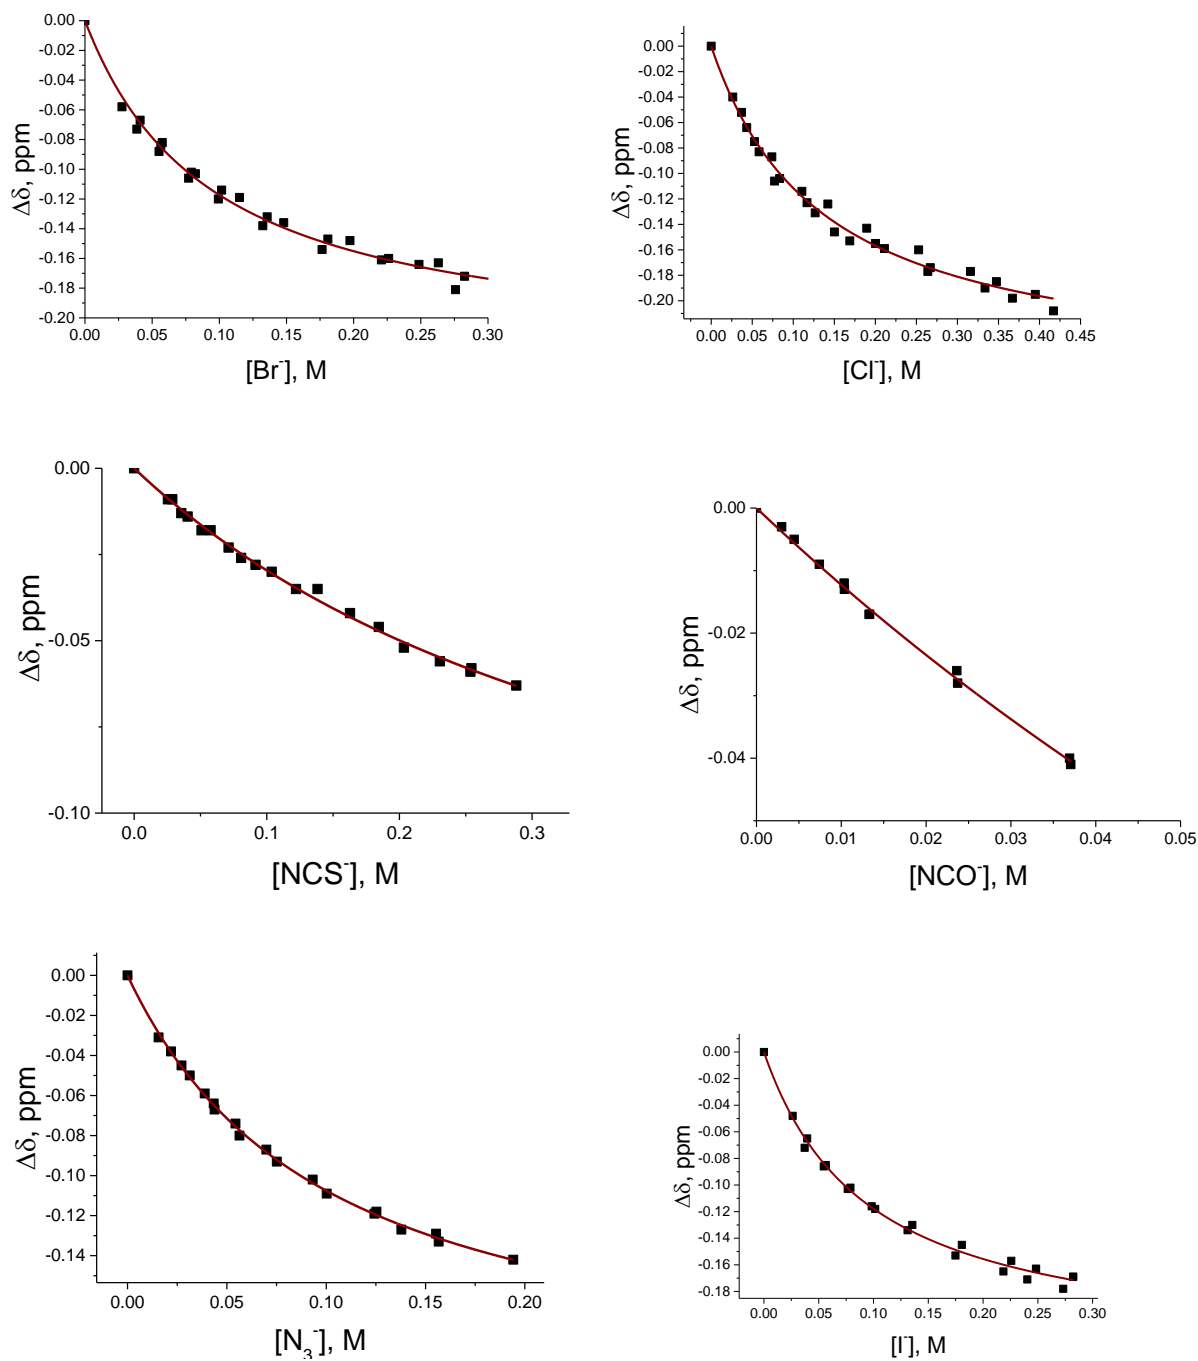

**Figure S9.** Results of the  $^1\text{H}$  NMR measurements of solutions with constant concentration of  $\text{CHI}_3$  (5.1 mM) and variable concentrations of with  $\text{A}^-$  anions (as indicated) ( $\text{CD}_3\text{CN}$ ,  $22^\circ\text{C}$ ) and their fitting using eq S8. Note, the combined results of 2-3 independent series for each pair are shown; anions were taken as  $\text{Pr}_4\text{NA}$  salts.

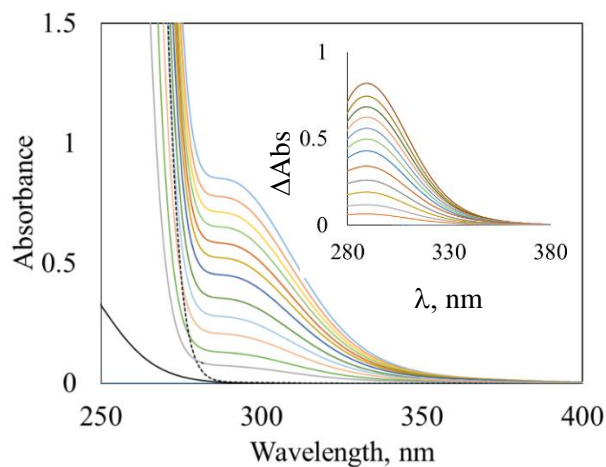

**Figure S10.** Spectra of solutions with constant concentration of  $\text{CHBr}_3$  (5.0 mM) and various concentrations of  $\text{Pr}_4\text{NI}$  (solid lines from the bottom to the top: 0, 13.7, 27.4, 45.6, 63.9, 82.2, 110, 128, 146, 164, 183, 201 and 228 mM). Spectrum of the separate 200 mM solution of  $\text{Pr}_4\text{NI}$  is shown as a dashed line. Insert: Spectra obtained by subtraction of the absorption of components from the spectra of their mixtures.

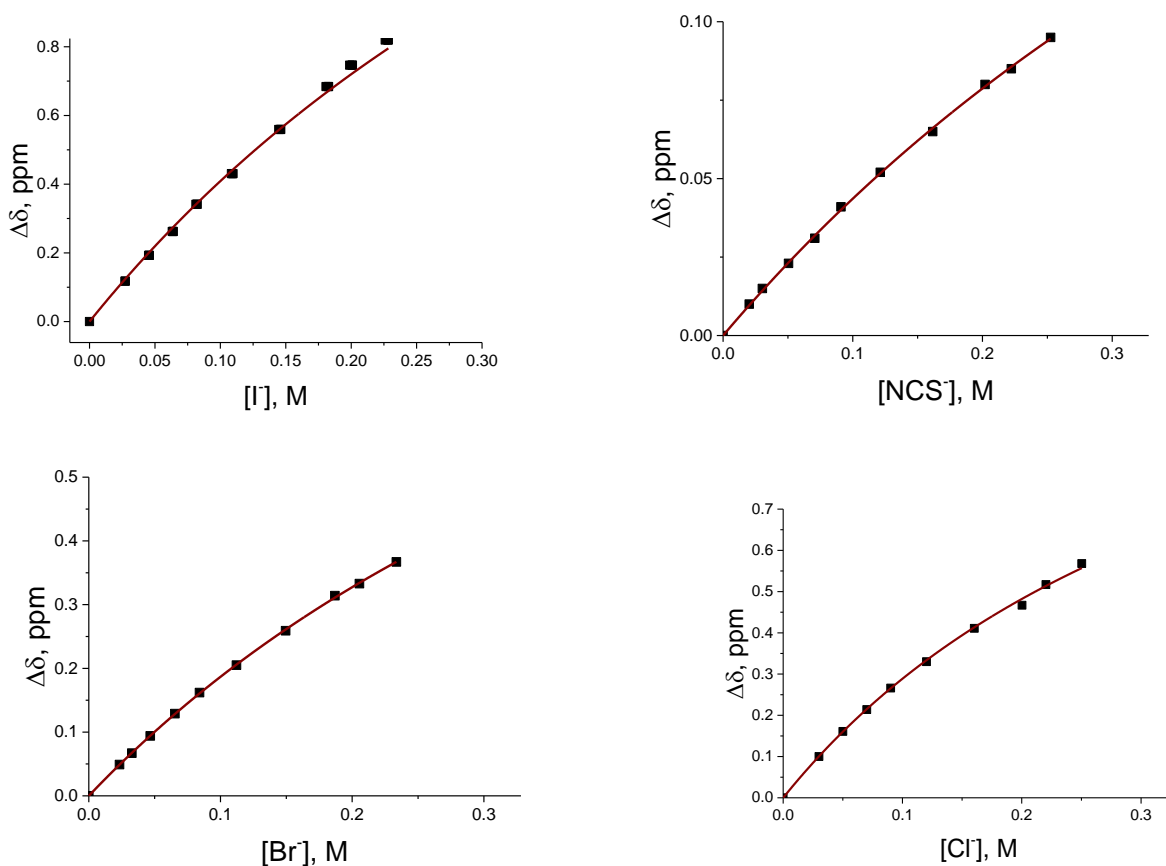

**Figure S11.** Results of the  $^1\text{H}$  NMR measurements of solutions with constant concentration of  $\text{CHBr}_3$  (5.0 mM) and variable concentrations of  $\text{A}^-$  anions (as indicated) ( $\text{CD}_3\text{CN}$ ,  $22^\circ\text{C}$ ) and their fitting using eq S8. Note, the combined results of 2-3 independent series for each pair are shown; anions were taken as  $\text{Pr}_4\text{NA}$  salts.

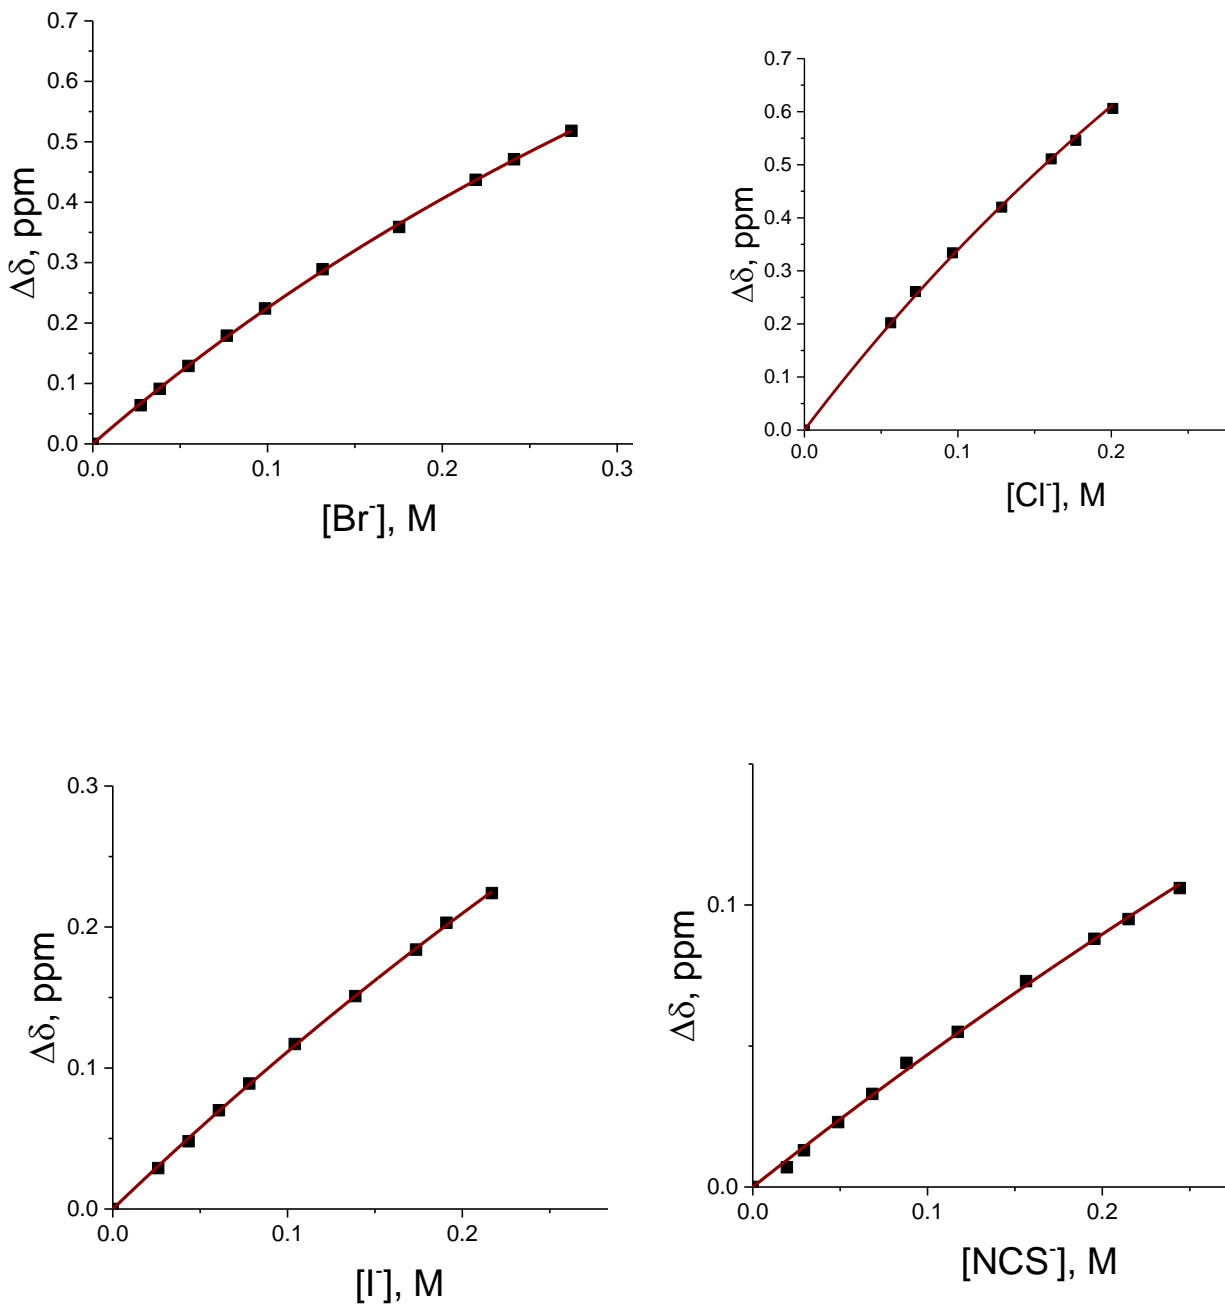

**Figure S12.** Results of the  $^1\text{H}$  NMR measurements of solutions with constant concentration of  $\text{CHCl}_3$  (5.1 mM) and variable concentrations of  $\text{A}^-$  anions (as indicated) ( $\text{CD}_3\text{CN}$ ,  $22^\circ\text{C}$ ) and their fitting using eq S8. Note, the combined results of 2-3 independent series for each pair are shown; anions were taken as  $\text{Pr}_4\text{NA}$  salts.

**Table S1.** Effective formation constants of  $[\text{CHX}_3, \text{A}^-]$  complexes.<sup>a</sup>

| $\text{CHX}_3$  | $\text{A}^-$ <sup>b</sup> | $K_{\text{UV}}^{\text{eff}}, \text{M}^{-1}$ | $K_{\text{NMR}}^{\text{eff}}, \text{M}^{-1}$ |
|-----------------|---------------------------|---------------------------------------------|----------------------------------------------|
| $\text{CHI}_3$  | $\text{I}^-$              | $10.5 \pm 0.9$                              | $10.9 \pm 0.5$                               |
|                 | $\text{Br}^-$             | $11.7 \pm 1.0$                              | $10.7 \pm 1.1$                               |
|                 | $\text{Cl}^-$             | $9.2 \pm 0.6$                               | $7.0 \pm 0.5$                                |
|                 | $\text{NCS}^-$            | $2.4 \pm 0.5$                               | $2.3 \pm 0.4$                                |
|                 | $\text{NCO}^-$            | $9.2 \pm 2.1$                               | $5.1 \pm 0.4$                                |
|                 | $\text{N}_3^-$            | $10.7 \pm 1.3$                              | $9.9 \pm 0.8$                                |
| $\text{CHBr}_3$ | $\text{I}^-$              | $0.4^{\text{c}}$                            | $1.0 \pm 0.1$                                |
|                 | $\text{Br}^-$             | $0.33^{\text{d}}$                           | $1.4 \pm 0.3$                                |
|                 | $\text{Cl}^-$             | -                                           | $2.4 \pm 0.3$                                |
|                 | $\text{NCS}^-$            | $\sim 0.3^{\text{e}}$                       | $1.2 \pm 0.1$                                |
|                 | $\text{NCO}^-$            | $\sim 0.1^{\text{e}}$                       | -                                            |
|                 | $\text{N}_3^-$            | $\sim 0.4^{\text{e}}$                       | -                                            |
| $\text{CHCl}_3$ | $\text{I}^-$              | -                                           | $0.6 \pm 0.1$                                |
|                 | $\text{Br}^-$             | -                                           | $1.3 \pm 0.2$                                |
|                 | $\text{Cl}^-$             | -                                           | $1.6 \pm 0.2$                                |
|                 | $\text{NCS}^-$            | -                                           | $0.5 \pm 0.2$                                |

a) In  $\text{CH}_3\text{CN}$ , calculated (as in earlier studies) assuming that only one type of complex is formed in solutions. b) Taken as salts with  $\text{Pr}_4\text{N}^+$  or  $\text{Bu}_4\text{N}^+$  counter-ions. c) From ref. 51. d) From ref. 49. e) From ref. 50.



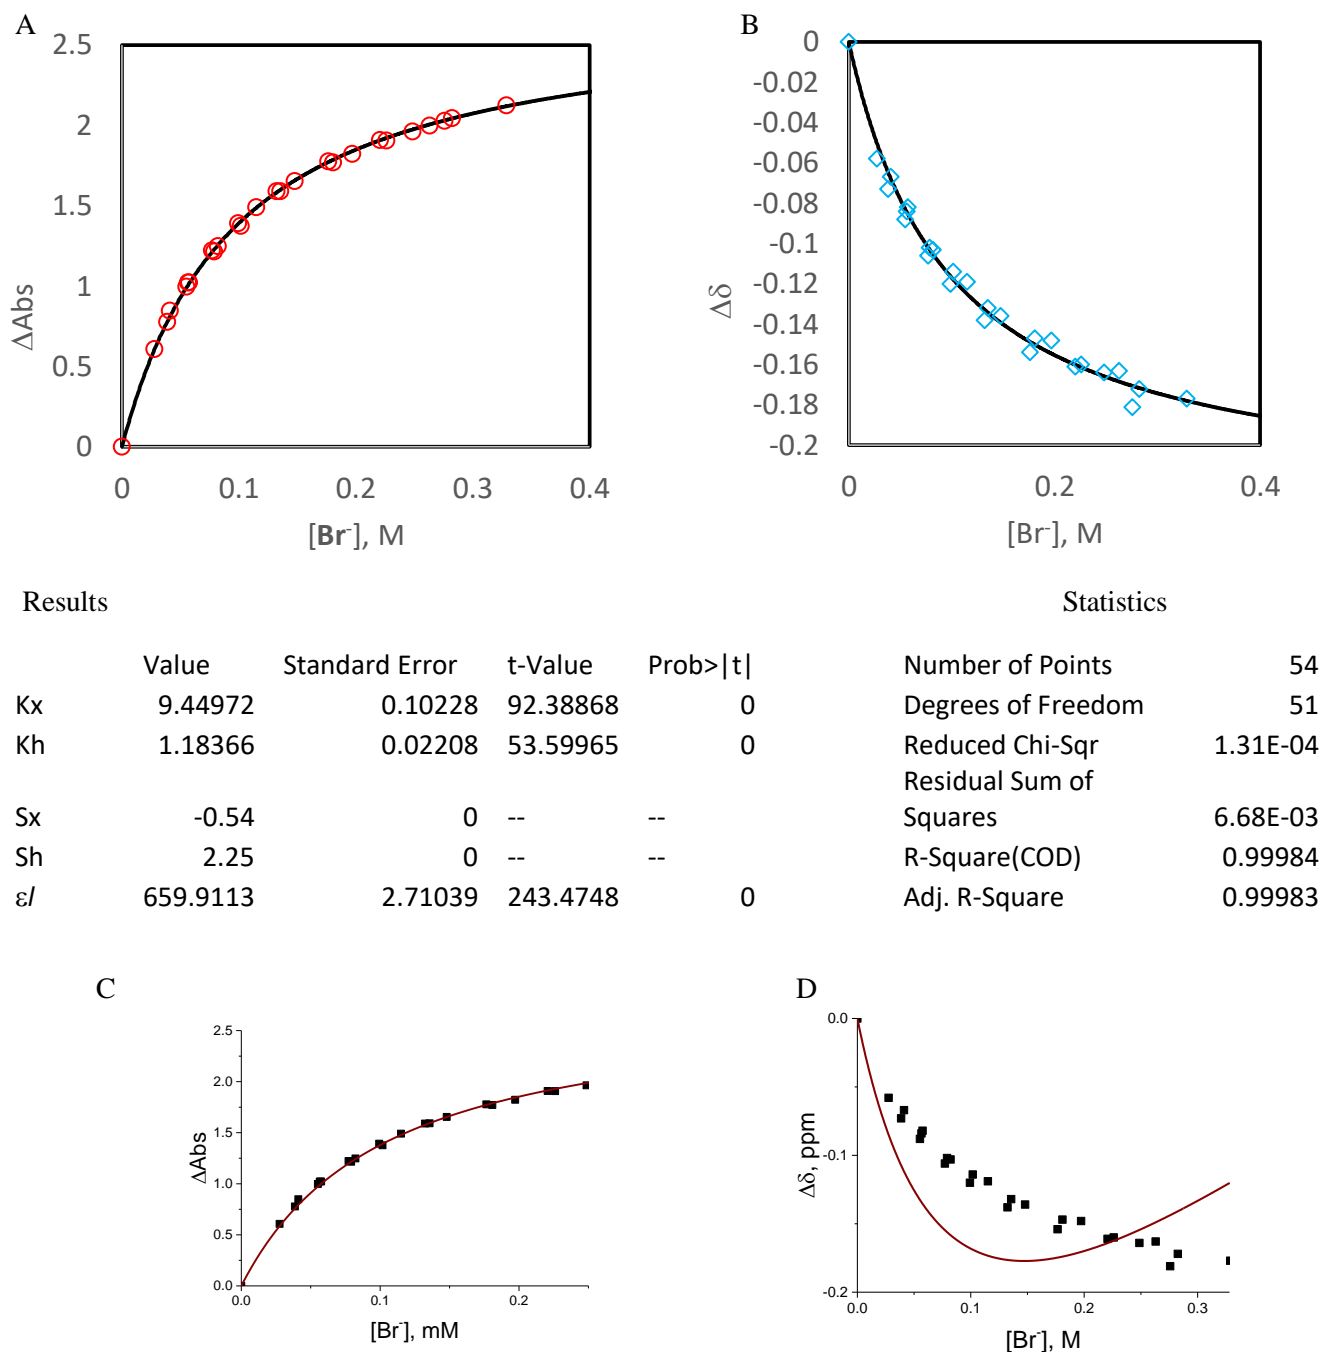

**Figure S13.** Results of the UV-Vis (A) and  $^1\text{H}$  NMR (B) measurements of solutions with constant concentration of  $\text{CHI}_3$  (5.1 mM) and variable concentrations of  $\text{Pr}_4\text{NBr}$  and their simultaneous multivariable fitting to eqs S24 and S25. Note that the combined results of 3 independent series are shown. The table below the figures shows results of the fitting and their statistical analysis which were copied from the output of the fitting (Origin 2016). Figures C and D illustrate *inadequacy* of the fitting assuming that formation of XB do not affect that of HB complexes, and vice versa (i.e.,  $K_{\text{XB}} = C_{\text{XB}} / ((C_{\text{D}}^0 - C_{\text{XB}})(C_{\text{A}}^0 - C_{\text{XB}}))$  and  $K_{\text{HB}} = C_{\text{HB}} / ((C_{\text{D}}^0 - C_{\text{HB}})(C_{\text{A}}^0 - C_{\text{HB}}))$ ).

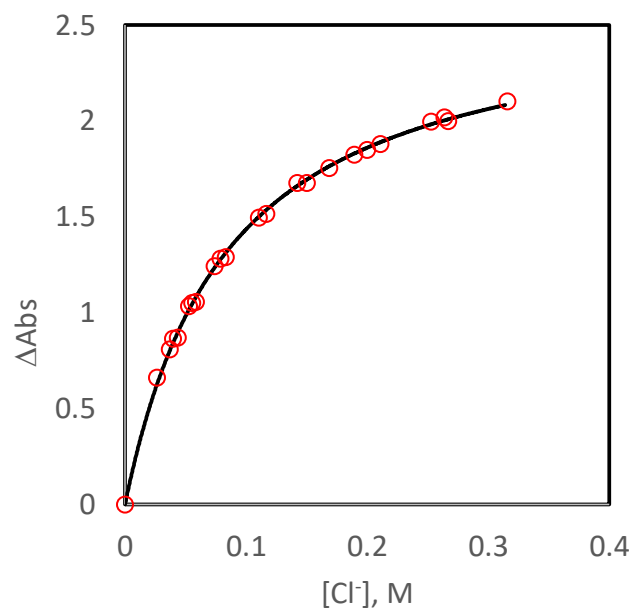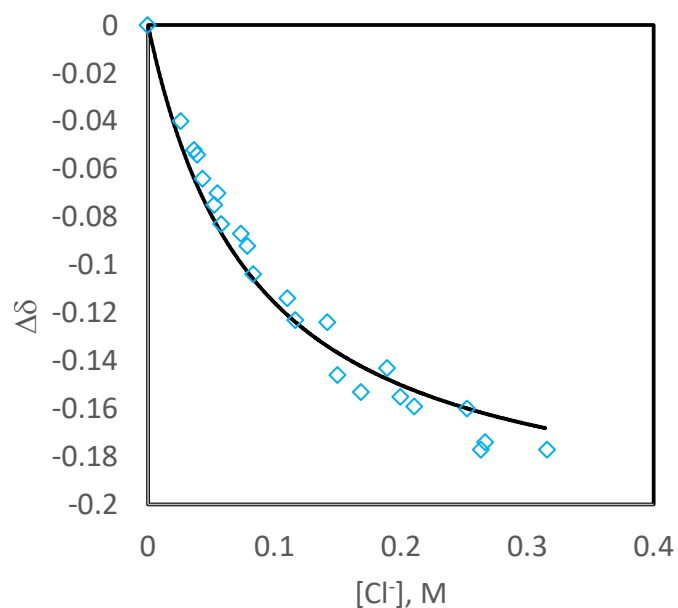

## Results

|              | Value     | Standard Error | t-Value  | Prob> t |
|--------------|-----------|----------------|----------|---------|
| Kx           | 10.40763  | 0.14838        | 70.14397 | 0       |
| Kh           | 1.9523    | 0.04152        | 47.01999 | 0       |
| Sx           | -0.61     | 0              | --       | --      |
| Sh           | 1.91      | 0              | --       | --      |
| $\epsilon l$ | 669.05244 | 3.6798         | 181.8178 | 0       |

## Statistics

|                         |          |
|-------------------------|----------|
| Number of Points        | 48       |
| Degrees of Freedom      | 45       |
| Reduced Chi-Sqr         | 1.88E-04 |
| Residual Sum of Squares | 0.00845  |
| R-Square(COD)           | 0.99975  |
| Adj. R-Square           | 0.99974  |

**Figure S14.** Results of the UV-Vis (A) and  $^1\text{H}$  NMR (B) measurements of solutions with constant concentration of  $\text{CHI}_3$  (5.1 mM) and variable concentrations of  $\text{Pr}_4\text{NCl}$  and their simultaneous multivariable fitting to eqs S24 and S25. (Note, the combined results of 3 independent series). The tables below the figures shows results of the fitting and their statistical analysis which were copied from the output of the fitting (Origin 2016).

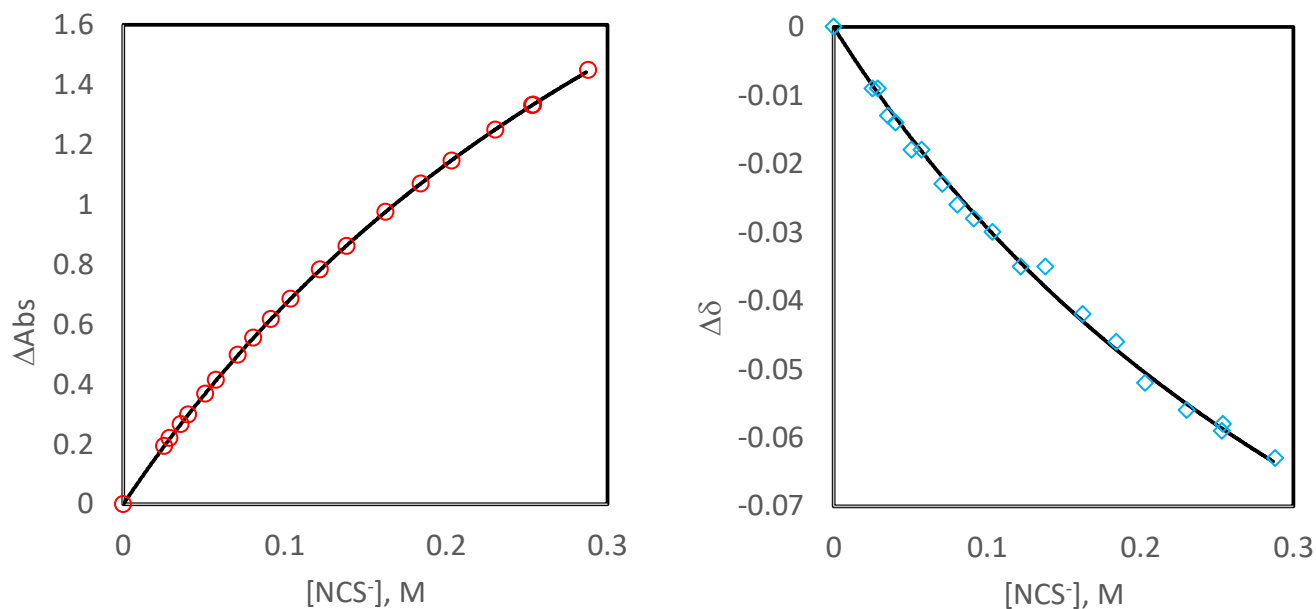

Results:

|             | Value      | Standard Error | t-Value  | Prob> t |
|-------------|------------|----------------|----------|---------|
| Kx          | 1.6953     | 0.00607        | 279.2472 | 0       |
| Kh          | 0.43096    | 0.00287        | 149.982  | 0       |
| Sx          | -0.46      | 0              | --       | --      |
| Sh          | 0.98       | 0              | --       | --      |
| $\epsilon/$ | 1028.01652 | 2.59811        | 395.6784 | 0       |

Statistics

|                         |          |
|-------------------------|----------|
| Number of Points        | 40       |
| Degrees of Freedom      | 37       |
| Reduced Chi-Sqr         | 1.25E-06 |
| Residual Sum of Squares | 4.63E-05 |
| R-Square(COD)           | 1        |
| Adj. R-Square           | 0.99999  |

**Figure S15.** Results of the UV-Vis (A) and  $^1\text{H}$  NMR (B) measurements of solutions with constant concentration of  $\text{CHI}_3$  (5.1 mM) and variable concentrations of  $\text{Pr}_4\text{NNCS}$  and their simultaneous multivariable fitting to eqs S24 and S25. (Note, the combined results of 3 independent series). The tables below the figures shows results of the fitting and their statistical analysis which were copied from the output of the fitting (Origin 2016).

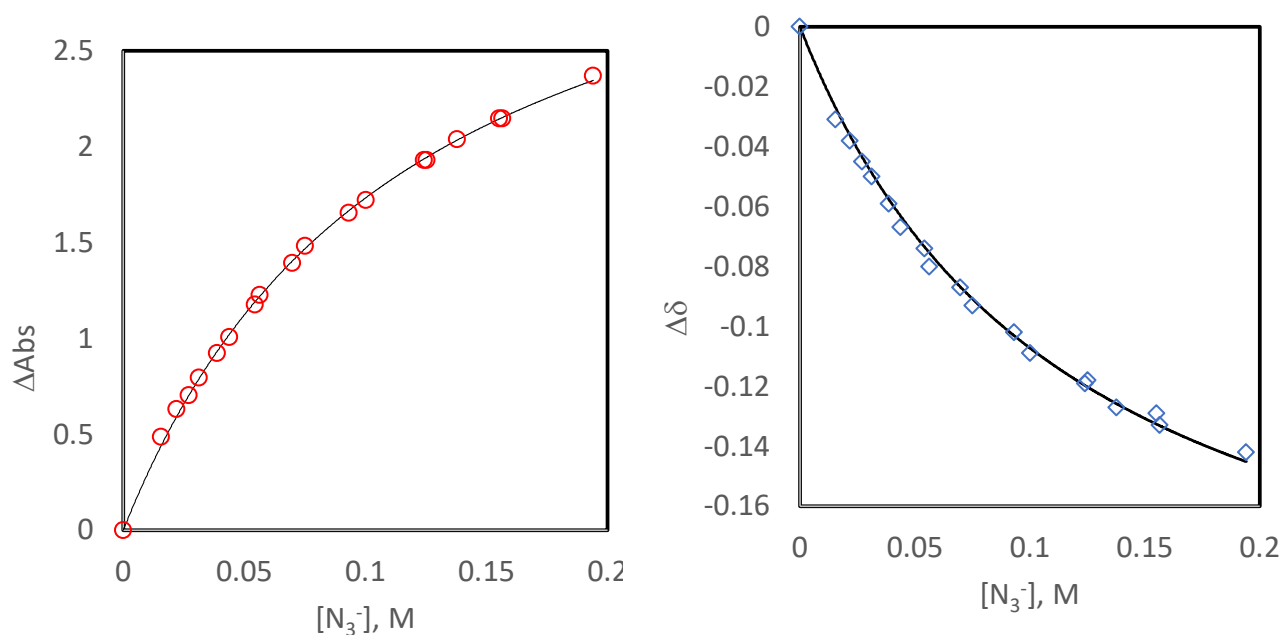

|    | Value    | Standard Error | t-Value  | Prob> t |
|----|----------|----------------|----------|---------|
| Kx | 7.63682  | 0.12909        | 59.1589  | 0       |
| Kh | 1.22041  | 0.035          | 34.87078 | 0       |
| Sx | -0.64    | 0              | --       | --      |
| Sh | 2.33     | 0              | --       | --      |
| E  | 961.3116 | 8.38307        | 114.673  | 0       |

|                         |          |
|-------------------------|----------|
| Number of Points        | 38       |
| Degrees of Freedom      | 35       |
| Reduced Chi-Sqr         | 1.65E-04 |
| Residual Sum of Squares | 0.00579  |
| R-Square(COD)           | 0.99979  |
| Adj. R-Square           | 0.99978  |

**Figure S16.** Results of the UV-Vis (A) and <sup>1</sup>H NMR (B) measurements of solutions with constant concentration of CHI<sub>3</sub> (5.1 mM) and variable concentrations of Pr<sub>4</sub>NN<sub>3</sub> and their simultaneous multivariable fitting to eqs S24 and S25. (Note, the combined results of 3 independent series). The tables below the figures shows results of the fitting and their statistical analysis which were copied from the output of the fitting (Origin 2016).

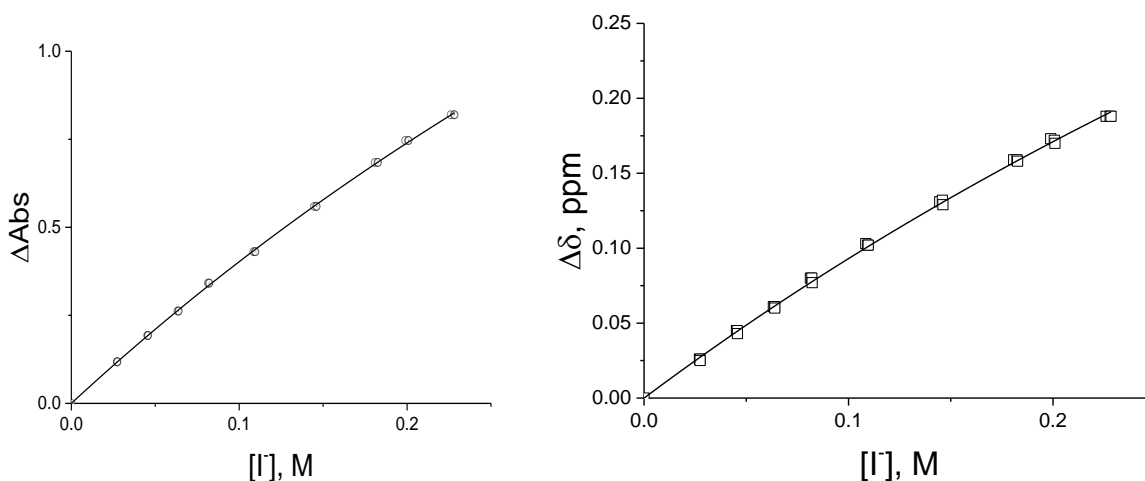

### Results

|             | Value    | Standard Error | t-Value  | Prob> t | Dependency |
|-------------|----------|----------------|----------|---------|------------|
| Kx          | 0.36855  | 0.02599        | 14.18103 | 0       | 0.99964    |
| Kh          | 0.6032   | 0.00707        | 85.29423 | 0       | 0.81803    |
| Sx          | -0.28    | 0              | --       | --      | 0          |
| Sh          | 1.87     | 0              | --       | --      | 0          |
| $\epsilon/$ | 2580.056 | 169.2578       | 15.24335 | 0       | 0.99963    |

### Statistics

|                         |          |
|-------------------------|----------|
| Number of Points        | 56       |
| Degrees of Freedom      | 53       |
| Reduced Chi-Sqr         | 1.16E-05 |
| Residual Sum of Squares | 6.13E-04 |
| R-Square(COD)           | 0.99982  |
| Adj. R-Square           | 0.99982  |

**Figure S17.** Results of the UV-Vis (A) and  $^1\text{H}$  NMR (B) measurements of solutions with constant concentration of  $\text{CHBr}_3$  (5.0 mM) and variable concentrations of  $\text{Pr}_4\text{NI}$  and their simultaneous multivariable fitting to eqs S24 and S25. (Note, the combined results of 2 independent series). The tables below the figures shows results of the fitting and their statistical analysis which were copied from the output of the fitting (Origin 2016).

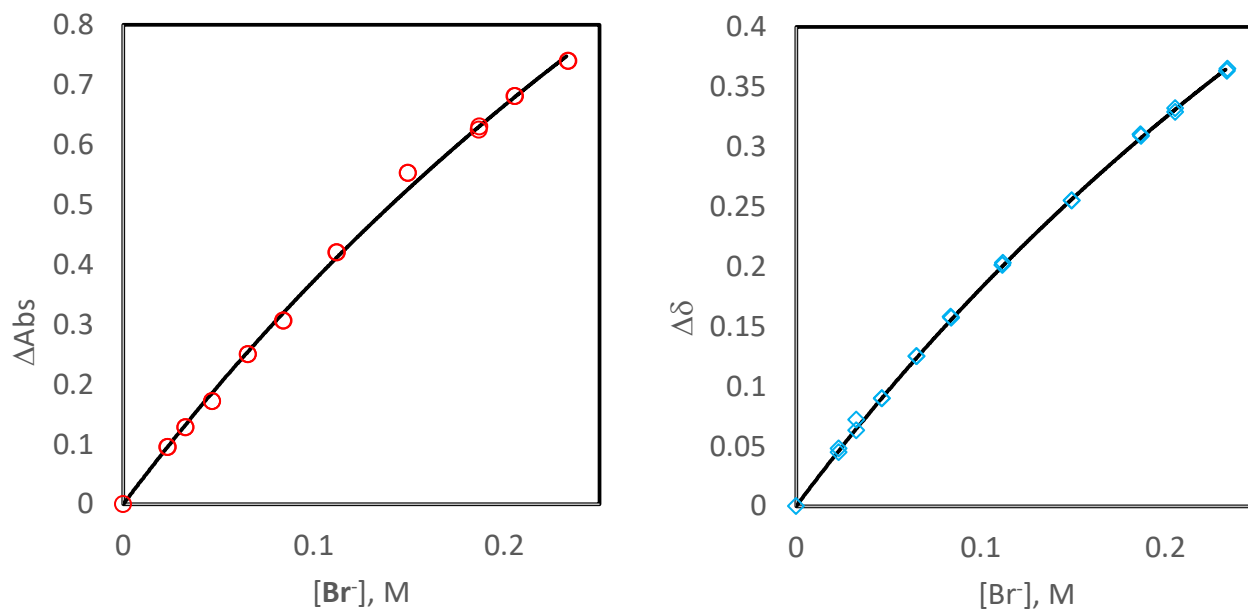

### Results

|             | Value    | Standard Error | t-Value  | Prob> t  |
|-------------|----------|----------------|----------|----------|
| Kx          | 0.51888  | 0.08104        | 6.40309  | 1.43E-07 |
| Kh          | 0.86927  | 0.02244        | 38.73442 | 0        |
| Sx          | -0.31    | 0              | --       | --       |
| Sh          | 2.58     | 0              | --       | --       |
| $\epsilon/$ | 1443.278 | 204.2232       | 7.06716  | 1.73E-08 |

### Statistics

|                         |          |
|-------------------------|----------|
| Number of Points        | 42       |
| Degrees of Freedom      | 39       |
| Reduced Chi-Sqr         | 7.11E-05 |
| Residual Sum of Squares | 2.77E-03 |
| R-Square(COD)           | 0.99851  |
| Adj. R-Square           | 0.99843  |

**Figure S18.** Results of the UV-Vis (A) and <sup>1</sup>H NMR (B) measurements of solutions with constant concentration of  $\text{CHBr}_3$  (5.0 mM) and variable concentrations of  $\text{Pr}_4\text{NBr}$  and their simultaneous multivariable fitting to eqs S24 and S25. (Note, the combined results of 2 independent series). The tables below the figures shows results of the fitting and their statistical analysis which were copied from the output of the fitting (Origin 2016). Br

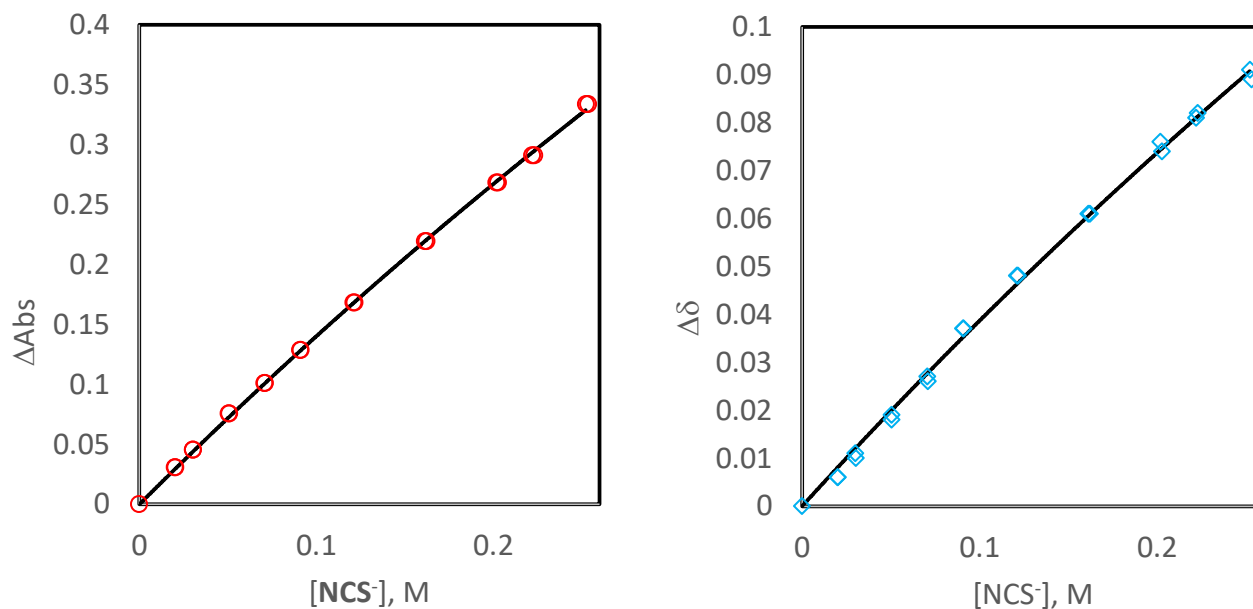

#### Results

|             | Value    | Standard Error | t-Value  | Prob> t | Dependency |
|-------------|----------|----------------|----------|---------|------------|
| Kx          | 0.09234  | 0.03277        | 2.818    | 0.00755 | 0.99996    |
| Kh          | 0.43277  | 0.01081        | 40.04458 | 0       | 0.91109    |
| Sx          | -0.22    | 0              | --       | --      | 0          |
| Sh          | 0.99     | 0              | --       | --      | 0          |
| $\epsilon/$ | 3202.691 | 1111.362       | 2.88177  | 0.0064  | 0.99996    |

#### Statistics

|                         |          |
|-------------------------|----------|
| Number of Points        | 42       |
| Degrees of Freedom      | 39       |
| Reduced Chi-Sqr         | 3.30E-06 |
| Residual Sum of Squares | 1.29E-04 |
| R-Square(COD)           | 0.99967  |
| Adj. R-Square           | 0.99965  |

**Figure S19.** Results of the UV-Vis (A) and <sup>1</sup>H NMR (B) measurements of solutions with constant concentration of CHBr<sub>3</sub> (5.0 mM) and variable concentrations of Pr<sub>4</sub>NNCS and their simultaneous multivariable fitting to eqs S24 and S25. (Note, the combined results of 2 independent series). The tables below the figures shows results of the fitting and their statistical analysis which were copied from the output of the fitting (Origin 2016).

### Comparison of the simultaneous and separate fittings of the UV-Vis and NMR data

Since analysis of the equilibria in the solutions containing  $\text{CHX}_3$  and anions produced expressions for  $\Delta\text{Abs}$  and  $\Delta\delta$  which include  $K_{\text{HB}}$  and  $K_{\text{XB}}$  (eqs S24 and S25), we carried out separate fitting of the UV-Vis data measured for each pair using eq S24 and separate fitting of the NMR data using eq S25. Importantly, these fitting were based on the model which takes into account formation of both XB and HB complexes, and produce both  $K_{\text{XB}}$  and  $K_{\text{HB}}$  values (in contrast to the earlier studies, in which separate treatments of the UV-Vis and NMR data were done assuming formation of only one type of complex yielding  $K_{\text{UV}}^{\text{eff}}$  and  $K_{\text{NMR}}^{\text{eff}}$  values). The principal results of such fitting ( $K_{\text{H}}$ ,  $K_{\text{X}}$  and their standard errors) are listed in Table S2.

**Table S2.** Comparison of the results of simultaneous and separate fitting of the UV-Vis and NMR data.

| Pair                         |                 | Values from simultaneous (multivariable) fitting |                           | Values from fitting of NMR data only <sup>a</sup> |                            | $K(\text{NMR})/K(\text{NMR}+\text{UV})^{\text{c}}$ | Values from fitting of UV-Vis data only <sup>a</sup> |         |
|------------------------------|-----------------|--------------------------------------------------|---------------------------|---------------------------------------------------|----------------------------|----------------------------------------------------|------------------------------------------------------|---------|
|                              |                 | Value                                            | Std Err                   | Value                                             | Std Err                    |                                                    | Value                                                | Std Err |
| $\text{CHI}_3/\text{Br}^-$   | $K_{\text{XB}}$ | 9.478                                            | 0.103                     | 9.730                                             | 0.500                      | 1.03                                               | 6.997                                                | 732     |
|                              | $K_{\text{HB}}$ | 1.188                                            | 0.022                     | 1.229                                             | 0.082                      | 1.03                                               | 3.667                                                | 735     |
| $\text{CHI}_3/\text{I}^-$    | $K_{\text{XB}}$ | 7.688                                            | 0.064                     | 9.454                                             | 0.423                      | 1.23                                               | 10.107                                               | 160     |
|                              | $K_{\text{HB}}$ | 1.125                                            | 0.031                     | 1.512                                             | 0.093                      | 1.34                                               | -1.297                                               | 160     |
| $\text{CHI}_3/\text{Cl}^-$   | $K_{\text{XB}}$ | 11.014                                           | 0.163                     | 6.850                                             | 0.502                      | 1.38                                               | 7.760                                                | 1474    |
|                              | $K_{\text{HB}}$ | 1.406                                            | 0.031                     | 0.760                                             | 0.077                      | 1.46                                               | 4.690                                                | 1479    |
| $\text{CHI}_3/\text{NCS}^-$  | $K_{\text{XB}}$ | 1.709                                            | 0.006                     | 1.862                                             | 0.148                      | 1.09                                               | 2.239                                                | 20      |
|                              | $K_{\text{HB}}$ | 0.420                                            | 0.003                     | 0.479                                             | 0.057                      | 1.14                                               | -0.109                                               | 20      |
| $\text{CHI}_3/\text{N}_3^-$  | $K_{\text{XB}}$ | 7.674                                            | 0.131                     | 8.931                                             | 0.292                      | 1.16                                               | 7.341                                                | 573     |
|                              | $K_{\text{HB}}$ | 1.227                                            | 0.035                     | 1.498                                             | 0.063                      | 1.22                                               | 1.554                                                | 574     |
| $\text{CHBr}_3/\text{Br}^-$  | $K_{\text{XB}}$ | 0.517                                            | 0.081                     | 0.596                                             | 0.049                      | 1.15                                               | 1.501                                                | 610     |
|                              | $K_{\text{HB}}$ | 0.868                                            | 0.022                     | 0.889                                             | 0.013                      | 1.02                                               | -0.138                                               | 612     |
| $\text{CHBr}_3/\text{I}^-$   | $K_{\text{XB}}$ | 0.369                                            | 0.026                     | 0.472                                             | 0.058                      | 1.28                                               | 1.510                                                | 230     |
|                              | $K_{\text{HB}}$ | 0.603                                            | 0.007                     | 0.630                                             | 0.015                      | 1.04                                               | -0.550                                               | 231     |
| $\text{CHBr}_3/\text{NCS}^-$ | $K_{\text{XB}}$ | 0.091                                            | 0.044                     | 0.087                                             | 0.126                      | 0.96                                               | 0.835                                                | 587     |
|                              | $K_{\text{HB}}$ | 0.436                                            | 0.014                     | 0.434                                             | 0.040                      | 1.00                                               | -0.309                                               | 589     |
| Average                      |                 |                                                  | 0.049 (5.8%) <sup>b</sup> |                                                   | 0.159(15.3 %) <sup>b</sup> | 1.16                                               |                                                      | 549     |

a) Taking into account formation of both XB and HB complexes. b) Average relative error (i.e.  $1/n\sum (\text{error}_i/\text{value}_i)$ ); c) Ratio of the value obtained from the separate fitting of the NMR data to that obtained from the simultaneous fitting of UV and NMR data.

The  $K_{\text{HB}}$  and  $K_{\text{XB}}$  constants resulting from the separate fitting of the NMR data are consistent (within the accuracy of experiments) with the values from the simultaneous fitting of the NMR and UV-Vis data. Yet, the errors from the separate fittings of the NMR data are, on average, about three times higher than that from the simultaneous fitting. Importantly, the calculated shifts of the NMR proton signal depend on the values of  $\Delta\delta_{\text{XB}}$  and  $\Delta\delta_{\text{HB}}$  taken from calculation. Since the simultaneous fittings yield the values, which describe variations of UV-Vis spectral data as well, the values resulting from such fitting are apparently more reliable. The values of  $\Delta\text{Abs}$  are related only to the concentration of the XB complexes, and their separate three-parameters fitting using eq S24 produced large standard errors (though the accuracy of the UV-Vis measurements was somewhat higher



than that of the NMR measurements).<sup>6</sup> Overall, these data indicate that the combined fitting yield more reliable and accurate  $K_{HB}$  and  $K_{XB}$  values than the separate fittings. Thus, the conclusions of the paper are based on the results of only combined fittings.

It should be also noted that expression for the UV-Vis spectral changes  $\Delta Abs = \epsilon l \times C_{XB}$  (eq S24 or eq 8 in the text) neglect the spectral changes related to the formation of HB complexes (since spectra of the HB complexes are close to that of the separate molecules). If such changes are taken into account,  $\Delta Abs$  is expressed as:

$$\Delta Abs = \Delta \epsilon_{XB} l \times C_{XB} + \Delta \epsilon_{HB} l \times C_{HB} \quad (S26)$$

where  $\Delta \epsilon_{XB}$  are  $\Delta \epsilon_{HB}$  differences between extinction coefficients of XB or HB bonded complexes and the separate  $CHX_3$  molecules. Eq 26 could be rearranged as:

$$\Delta Abs = (\Delta \epsilon_{XB} + \Delta \epsilon_{HB} C_{HB} / C_{XB}) \times l \times C_{XB} \quad (S27)$$

Taking into account eq S19,  $C_{HB} = K_{HB} C_{XB} / K_{XB}$ , leads to

$$\Delta Abs = (\Delta \epsilon_{XB} + \Delta \epsilon_{HB} K_{HB} / K_{XB}) \times l \times C_{XB} \quad (S28)$$

Accordingly, eq S24 (eq 10 in the text) for fitting of UV-Vis data can be re-written as:

$$\begin{aligned} \Delta Abs = \\ = \epsilon l \times \{ (C_A^0 + C_D^0 + 1 / (K_{XB} + K_{HB})) - ((C_A^0 + C_D^0 + 1 / (K_{XB} + K_{HB}))^2 - 4 C_A^0 C_D^0)^{0.5} \} / (2(1 + K_{HB} / K_{XB})) \end{aligned} \quad (S29)$$

where  $\epsilon = \Delta \epsilon_{XB} + \Delta \epsilon_{HB} K_{HB} / K_{XB}$ .

Equation S29 is identical to that in eq S24 (or eq 10), but with  $\epsilon = \Delta \epsilon_{XB} + \Delta \epsilon_{HB} K_{HB} / K_{XB}$ . As such, fitting UV-Vis data using eq 29 would produce the same values of  $K_{HB}$  and  $K_{XB}$  as that obtained using eq 24. This analysis, however, shows that the extinction coefficients  $\epsilon$  resulted from the separate fitting of UV-Vis data or combined fittings of NMR and UV-Vis data may differ more or less significantly from the extinction coefficients of the halogen-bonded complexes.

---

<sup>6</sup>Somewhat higher accuracy of the UV-Vis measurements is related to two factors, i.e. a) absolute errors in volumes of aliquots used in preparations of the solutions were the same, but the overall volume of the solution used for the UV-Vis measurements were typically twice as higher as that in the NMR; and b) since the ratio of the absolute changes in  $\Delta Abs$  were larger than that of  $\Delta \delta$  while the accuracy of the measurements of individual values of  $Abs$  and  $\delta$  were similar.

The large standard errors in the last column of Table S2 d to two variable parameters ( $K_{XB}$ ,  $K_{HB}$ ) used for  $\Delta \delta$  fittings via eq S25. The comparable fittings of the UV-Vis and NMR data (using, in both cases, two variable parameters,  $K_{XB}$  and  $K_{HB}$ , and fixed values of  $\epsilon$  or  $\Delta \delta_{XB}$  and  $\Delta \delta_{HB}$ ) yield similar standard errors. For example, the two-parameter fitting of the UV-Vis data for  $CHI_3/I^-$  pair yielded  $K_{XB} = 7.660 \pm 0.052$  and  $K_{HB} = 1.110 \pm 0.049$ , while comparable fitting of the NMR data yielded  $K_{XB} = 9.954 \pm 0.423$  and  $K_{HB} = 1.512 \pm 0.093$ ; and fitting of UV-Vis data for  $CHBr_3/I^-$  pair yielded  $K_{XB} = 0.362 \pm 0.002$  and  $K_{HB} = 0.604 \pm 0.048$ , while NMR data yielded:  $K_{XB} = 0.472 \pm 0.058$  and  $K_{HB} = 0.630 \pm 0.015$ .

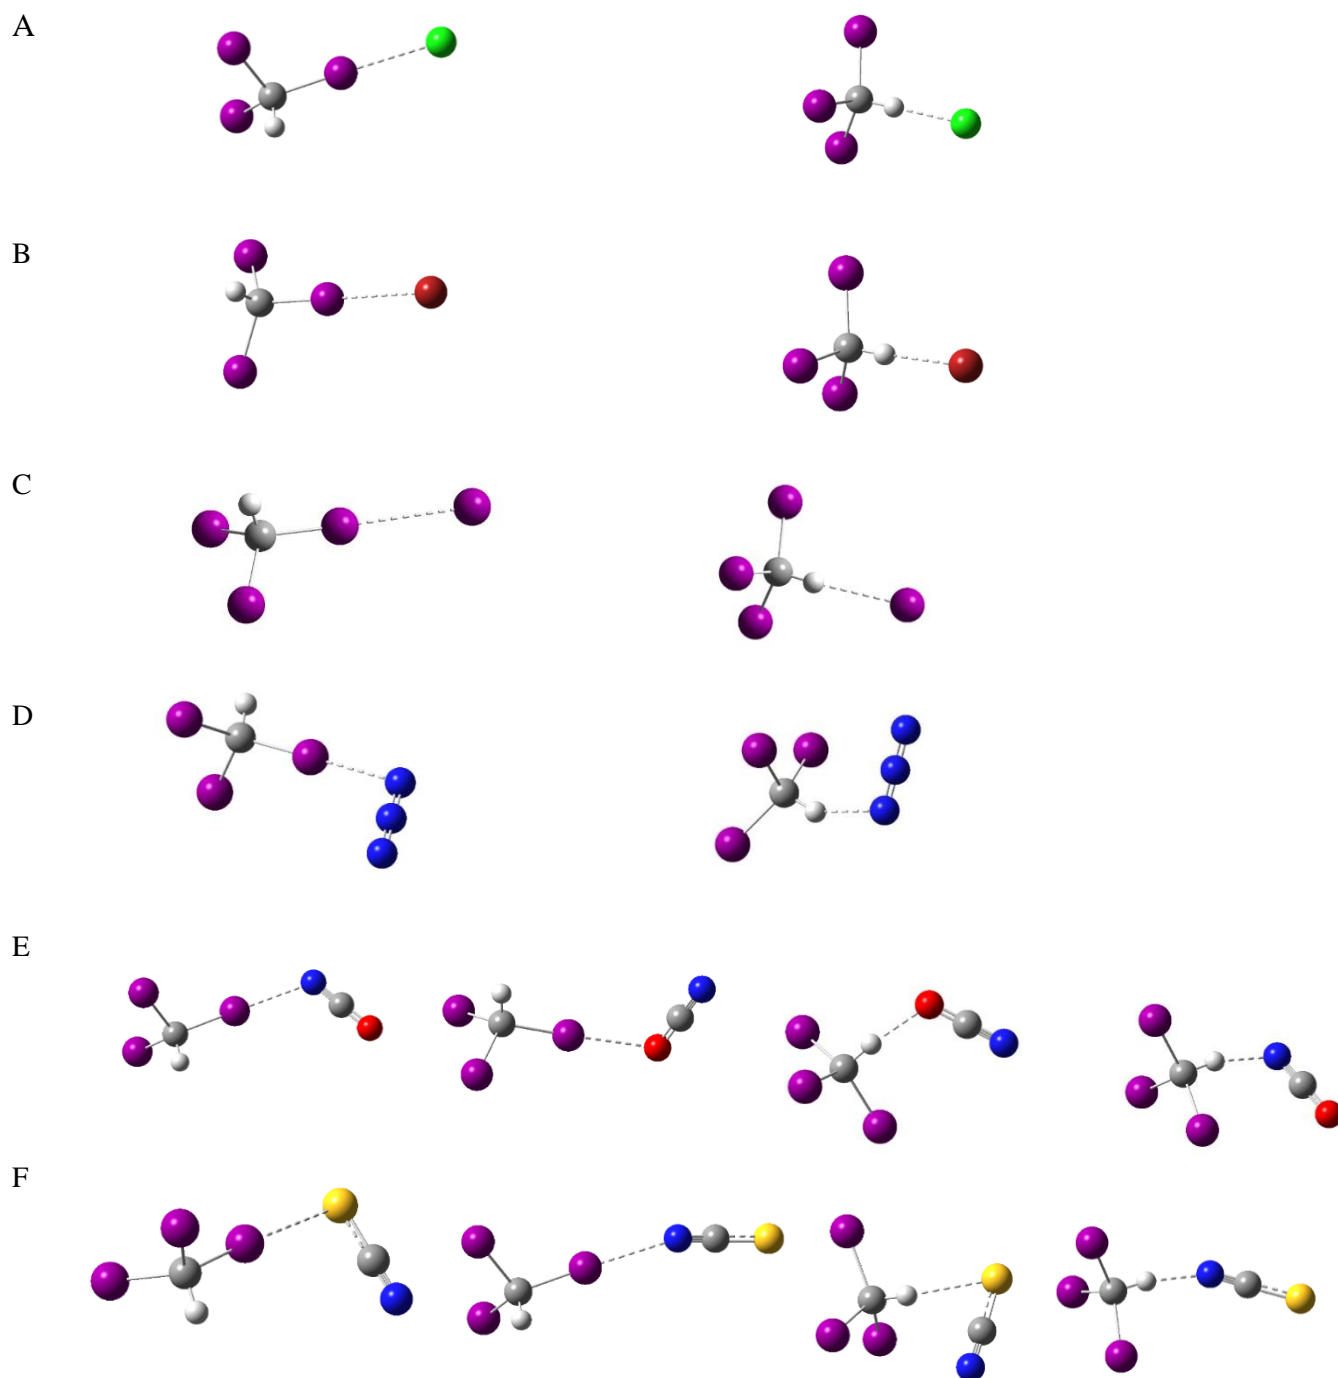

**Figure S20.** Structures of the  $[\text{CHI}_3, \text{A}^-]$  complexes resulting from the M06-2X/def-TZVPP computations ( $\text{CH}_3\text{CN}$ ):  $\text{A}^- = \text{Cl}^-$  (A),  $\text{Br}^-$  (B),  $\text{I}^-$  (C),  $\text{N}_3^-$  (D),  $\text{NCO}^-$  (E),  $\text{NCS}^-$  (F).

**Table S3A.** Energies of the XB and HB [CHI<sub>3</sub>, A<sup>-</sup>] complexes resulting from the M06-2X/def-TZVPP computations (CH<sub>3</sub>CN).<sup>a</sup>

| CHX <sub>3</sub>  | A                  | E, Hartree   |              | $\Delta E$ , kcal/mol <sup>b</sup> |       | BSSE, Hartree |         |
|-------------------|--------------------|--------------|--------------|------------------------------------|-------|---------------|---------|
|                   |                    | XB           | HB           | XB                                 | HB    | XB            | HB      |
| CHI <sub>3</sub>  | Cl                 | -1391.96176  | -1391.96060  | -3.98                              | -3.01 | 0.00292       | 0.00317 |
|                   | Br                 | -3505.96671  | -3505.96569  | -3.80                              | -2.93 | 0.00168       | 0.00201 |
|                   | I                  | -1229.40704  | -1229.40601  | -3.75                              | -2.88 | 0.00050       | 0.00079 |
|                   | N <sub>3</sub>     | -1095.92156  | -1095.91918  | -5.17                              | -3.49 | 0.00106       | 0.00127 |
|                   | NCS-S <sup>c</sup> | -1422.78923  | -1422.78873  | -3.85                              | -3.33 | 0.00077       | 0.00091 |
|                   | NCS-N <sup>c</sup> | -1422.78815  | -1422.78686  | -3.12                              | -2.95 | 0.00078       | 0.00064 |
|                   | NCO-O <sup>c</sup> | -1099.82489  | -1099.82489  | -3.59                              | -2.74 | 0.00080       | 0.00109 |
|                   | NCO-N <sup>c</sup> | -1099.82666  | -1099.82545  | -4.67                              | -3.87 | 0.00092       | 0.00108 |
| CHBr <sub>3</sub> | Cl                 | -8221.64791  | -8221.65107  | -1.65                              | -3.28 | 0.00209       | 0.00288 |
|                   | Br                 | -10335.65365 | -10335.65605 | -1.74                              | -2.90 | 0.00117       | 0.00188 |
|                   | I                  | -8059.09456  | -8059.09627  | -1.82                              | -2.70 | 0.00036       | 0.00074 |
|                   | N <sub>3</sub>     | -7925.60755  | -7925.60937  | -2.33                              | -3.56 | 0.00079       | 0.00112 |
|                   | NCS-S <sup>c</sup> | -8252.47668  | -8252.47890  | -1.98                              | -3.12 | 0.00059       | 0.00084 |
|                   | NCS-N <sup>c</sup> | -8252.47560  | -8252.47814  | -1.33                              | -2.79 | 0.00050       | 0.00068 |
|                   | NCO-O <sup>c</sup> | -7929.51237  | -7929.51453  | -1.75                              | -2.83 | 0.00073       | 0.00107 |
|                   | NCO-N <sup>c</sup> | -7929.51283  | -7929.51500  | -2.06                              | -2.77 | 0.00069       | 0.00102 |
| CHCl <sub>3</sub> | Cl                 | -1879.66466  | -1879.66960  | -0.52                              | -2.93 | 0.00140       | 0.00260 |
|                   | Br                 | -3993.67076  | -3993.67463  | -0.66                              | -2.62 | 0.00081       | 0.00161 |
|                   | I                  | -1717.11205  | -1717.11497  | -0.77                              | -2.41 | 0.00026       | 0.00057 |
|                   | N <sub>3</sub>     | -1583.62450  | -1583.62837  | -1.11                              | -3.24 | 0.00058       | 0.00111 |
|                   | NCS-S <sup>c</sup> | -1910.49423  | -1910.49701  | -1.04                              | -2.55 | 0.00042       | 0.00075 |
|                   | NCS-N <sup>c</sup> | -1910.49398  | -1910.49699  | -0.91                              | -2.68 | 0.00036       | 0.00062 |
|                   | NCO-O <sup>c</sup> | -1587.52994  | -1587.53334  | -0.83                              | -2.75 | 0.00053       | 0.00097 |
|                   | NCO-N <sup>c</sup> | -1587.53000  | -1587.53479  | -0.90                              | -3.76 | 0.00051       | 0.00089 |

a) Energies of the separate trihalomethanes CHI<sub>3</sub> -931.58196 CHBr<sub>3</sub> -7761.27261 CHCl<sub>3</sub> -1419.29184 Hartree.

b)  $\Delta E = E_{\text{comp}} - (E_{\text{CHX}_3} + E_{\text{A}}) + \text{BSSE}$  where  $E_{\text{comp}}$ ,  $E_{\text{CHX}_3}$  and  $E_{\text{A}}$  are sums of the electronic and ZPE of the complex, CHX<sub>3</sub> and anion and BSSE is a basis set superposition error.

c) HB- or XB- bonded atom of anion (see structures in Figure S19).

**Table S3B.** Energies of the XB and HB [CHI<sub>3</sub>, A] complexes resulting from the M06-2X/def-TZVPP computations (gas phase).<sup>a</sup>

| CHX <sub>3</sub>  | A                  | Energy       |              | $\Delta E$ , kcal/mol <sup>b</sup> |        | BSSE    |         |
|-------------------|--------------------|--------------|--------------|------------------------------------|--------|---------|---------|
|                   |                    | XB           | HB           | XB                                 | HB     | XB      | HB      |
| CHI <sub>3</sub>  | Cl                 | -1391.87941  | -1391.86990  | -25.95                             | -20.37 | 0.00350 | 0.00361 |
|                   | Br                 | -3505.88621  | -3505.87850  | -21.75                             | -17.02 | 0.00202 | 0.00222 |
|                   | I                  | -1229.33010  | -1229.32380  | -18.08                             | -14.17 | 0.00060 | 0.00075 |
|                   | N <sub>3</sub>     | -1095.84680  | -1095.83690  | -22.72                             | -17.12 | 0.00150 | 0.00132 |
|                   | NCS-S <sup>c</sup> | -1422.71446  | -1422.70807  | -16.53                             | -12.51 | 0.00089 | 0.00097 |
|                   | NCS-N <sup>c</sup> | -1422.71284  | -1422.70925  | -15.37                             | -13.36 | 0.00084 | 0.00073 |
|                   | NCO-O <sup>c</sup> | -1099.74208  | -1099.73738  | -16.97                             | -14.32 | 0.00122 | 0.00109 |
|                   | NCO-N <sup>c</sup> | -1099.75083  | -1099.74374  | -22.27                             | -18.37 | 0.00143 | 0.00121 |
| CHBr <sub>3</sub> | Cl                 | -8221.55283  | -8221.55998  | -15.51                             | -20.09 | 0.00253 | 0.00322 |
|                   | Br                 | -10335.56207 | -10335.56862 | -12.57                             | -16.35 | 0.00145 | 0.00204 |
|                   | I                  | -8059.00814  | -8059.01376  | -10.01                             | -13.50 | 0.00042 | 0.00068 |
|                   | N <sub>3</sub>     | -7925.52136  | -7925.52743  | -12.78                             | -16.81 | 0.00094 | 0.00126 |
|                   | NCS-S <sup>c</sup> | -8252.39390  | -8252.39845  | -9.38                              | -12.15 | 0.00070 | 0.00091 |
|                   | NCS-N <sup>c</sup> | -8252.39303  | -8252.40079  | -8.71                              | -13.72 | 0.00060 | 0.00074 |
|                   | NCO-O <sup>c</sup> | -7929.42203  | -7929.42870  | -10.29                             | -14.64 | 0.00077 | 0.00107 |
|                   | NCO-N <sup>c</sup> | -7929.42585  | -7929.43464  | -12.64                             | -18.50 | 0.00085 | 0.00104 |
| CHCl <sub>3</sub> | Cl                 | -1879.56099  | -1879.57702  | -8.81                              | -18.45 | 0.00165 | 0.00290 |
|                   | Br                 | -3993.57222  | -3993.58611  | -6.92                              | -15.16 | 0.00089 | 0.00184 |
|                   | I                  | -1717.02004  | -1717.03186  | -5.23                              | -12.47 | 0.00022 | 0.00066 |
|                   | N <sub>3</sub>     | -1583.53130  | -1583.54540  | -6.76                              | -15.81 | 0.00073 | 0.00113 |
|                   | NCS-S <sup>c</sup> | -1910.40558  | -1910.41677  | -4.51                              | -11.38 | 0.00049 | 0.00091 |
|                   | NCS-N <sup>c</sup> | -1910.40664  | -1910.41943  | -5.11                              | -13.14 | 0.00039 | 0.00067 |
|                   | NCO-O <sup>c</sup> | -1587.43523  | -1587.44743  | -6.32                              | -14.03 | 0.00069 | 0.00102 |
|                   | NCO-N <sup>c</sup> | -1587.43676  | -1587.45262  | -7.34                              | -17.50 | 0.00063 | 0.00093 |

a) Energies of the separate trihalomethanes are: CHI<sub>3</sub> -931.57855CHBr<sub>3</sub> -7761.26960CHCl<sub>3</sub> -1419.28913 Hartree. b)  $\Delta E = E_{\text{comp}} - (E_{\text{CHX}_3} + E_A) + \text{BSSE}$  where  $E_{\text{comp}}$ ,  $E_{\text{CHX}_3}$  and  $E_A$  are sums of the electronic and ZPE of the complex, CHX<sub>3</sub> and anion and BSSE is a basis set superposition error. c) HB- or XB-bonded atom of the anion (see structures in Figure S19).

**Table S4.** Bond distances and angles in XB and HB complexes.<sup>ab</sup>

| CHX <sub>3</sub>  | A                  | CH <sub>3</sub> CN |       |       |       | Gas phase |       |       |       |
|-------------------|--------------------|--------------------|-------|-------|-------|-----------|-------|-------|-------|
|                   |                    | Distance           |       | Angle |       | Distance  |       | Angle |       |
|                   |                    | XB                 | HB    | XB    | HB    | XB        | HB    | XB    | HB    |
| CHI <sub>3</sub>  | Cl                 | 3.111              | 2.259 | 178.2 | 179.9 | 2.726     | 1.980 | 176.9 | 179.6 |
|                   | Br                 | 3.312              | 2.460 | 178.6 | 173.7 | 2.928     | 2.205 | 176.9 | 179.4 |
|                   | I                  | 3.569              | 2.726 | 178.3 | 161.4 | 3.166     | 2.467 | 176.6 | 178.8 |
|                   | N <sub>3</sub>     | 2.767              | 2.110 | 179.5 | 149.6 | 2.448     | 1.726 | 176.6 | 175.4 |
|                   | NCS-S <sup>c</sup> | 3.281              | 2.652 | 176.6 | 153.0 | 2.911     | 2.323 | 177.7 | 174.9 |
|                   | NCS-N <sup>c</sup> | 2.918              | 2.072 | 178.2 | 169.5 | 2.573     | 1.841 | 176.9 | 178.5 |
|                   | NCO-O <sup>c</sup> | 2.835              | 2.015 | 175.0 | 158.6 | 2.516     | 1.730 | 178.4 | 173.2 |
|                   | NCO-N <sup>c</sup> | 2.810              | 2.014 | 176.0 | 164.5 | 2.443     | 1.702 | 177.8 | 178.5 |
| CHBr <sub>3</sub> | Cl                 | 3.184              | 2.250 | 178.3 | 178.3 | 2.787     | 2.009 | 176.3 | 179.5 |
|                   | Br                 | 3.379              | 2.449 | 177.4 | 176.6 | 3.016     | 2.247 | 175.9 | 179.4 |
|                   | I                  | 3.615              | 2.709 | 176.9 | 163.9 | 3.302     | 2.507 | 175.5 | 179.3 |
|                   | N <sub>3</sub>     | 2.924              | 1.987 | 176.0 | 178.8 | 2.526     | 1.752 | 176.6 | 173.9 |
|                   | NCS-S <sup>c</sup> | 3.360              | 2.646 | 175.3 | 150.5 | 3.055     | 2.355 | 174.2 | 178.3 |
|                   | NCS-N <sup>c</sup> | 2.977              | 2.084 | 179.1 | 159.6 | 2.715     | 1.857 | 176.8 | 179.8 |
|                   | NCO-O <sup>c</sup> | 2.880              | 2.006 | 177.3 | 156.3 | 2.594     | 1.741 | 176.9 | 171.7 |
|                   | NCO-N <sup>c</sup> | 2.973              | 1.729 | 178.1 | 179.7 | 2.584     | 1.728 | 177.6 | 179.7 |
| CHCl <sub>3</sub> | Cl                 | 3.271              | 2.279 | 178.5 | 179.0 | 2.923     | 2.056 | 175.8 | 179.4 |
|                   | Br                 | 3.457              | 2.508 | 177.6 | 163.0 | 3.158     | 2.281 | 175.8 | 179.6 |
|                   | I                  | 3.681              | 2.788 | 177.7 | 152.5 | 3.431     | 2.590 | 176.0 | 179.4 |
|                   | N <sub>3</sub>     | 2.990              | 2.121 | 175.1 | 148.3 | 2.691     | 1.805 | 174.3 | 174.3 |
|                   | NCS-S <sup>c</sup> | 3.415              | 2.782 | 174.3 | 143.7 | 3.179     | 2.401 | 174.5 | 175.6 |
|                   | NCS-N <sup>c</sup> | 3.127              | 2.088 | 177.8 | 165.1 | 2.780     | 1.898 | 174.9 | 180.0 |
|                   | NCO-O <sup>c</sup> | 2.933              | 2.012 | 176.1 | 158.0 | 2.669     | 1.778 | 171.7 | 172.1 |
|                   | NCO-N <sup>c</sup> | 3.113              | 1.977 | 176.9 | 177.0 | 2.691     | 1.777 | 176.1 | 179.9 |

a) M06-2X/def-TZVPP computations. b) Distances (X...A or H...A), in Å, angles (C-X-A or C-H-A) in deg, c) HB- or XB-bonded atom of the anion (see structures in Figure S19).

**Table S5.** Calculated UV and NMR spectral characteristics of XB and HB complexes<sup>a)</sup>

| CHX <sub>3</sub>  | A              | $\lambda$ , nm |     | $\log \epsilon^b$ |                   | $\Delta\delta$ , ppm |        |       |
|-------------------|----------------|----------------|-----|-------------------|-------------------|----------------------|--------|-------|
|                   |                | XB             | HB  | XB                | EXP <sup>c</sup>  | HB                   | XB     | HB    |
| CHI <sub>3</sub>  | Cl             | 303            | 302 | 3.76              | 3.60              | 3.27                 | -0.608 | 2.907 |
|                   | Br             | 306            | 303 | 3.86              | 3.98              | 3.34                 | -0.543 | 2.254 |
|                   | I              | 314            | 318 | 4.06              | 4.06              | 3.40                 | -0.488 | 1.415 |
|                   | N <sub>3</sub> | 328            | 386 | 4.02              | 3.90              | 2.93                 | -0.639 | 2.334 |
|                   | NCS-S          | 311            | 329 | 4.02              | 3.95              | 2.81                 | -0.455 | 0.979 |
|                   | NCO-N          | 360            | 302 | 3.90              | 3.91              | 3.22                 | -0.534 | 2.817 |
| CHBr <sub>3</sub> | Cl             | 229            | 240 | 3.83              | 3.99              | 3.16                 | -0.353 | 3.143 |
|                   | Br             | 235            | 244 | 4.00              |                   | 3.23                 | -0.306 | 2.581 |
|                   | I              | 249            | 259 | 4.11              |                   | 3.39                 | -0.276 | 1.872 |
|                   | N <sub>3</sub> | 280            | 288 | 3.80              |                   | 3.04                 | -0.261 | 2.831 |
|                   | NCS-S          | 251            | 263 | 3.96              |                   | 2.63                 | -0.217 | 0.992 |
|                   | NCO-N          | 231            | 236 | 3.85              |                   | 2.95                 | -0.277 | 3.128 |
| CHCl <sub>3</sub> | Cl             | 186            | 194 | 3.86              |                   | 3.08                 | -0.343 | 2.993 |
|                   | Br             | 192            | 270 | 3.92              |                   | 3.08                 | -0.316 | 2.240 |
|                   | I              | 204            | 209 | 3.98              |                   | 3.34                 | -0.306 | 1.506 |
|                   | N <sub>3</sub> | 234            | 239 | 3.52              |                   | 2.75                 | -0.249 | 2.279 |
|                   | NCS-S          | 209            | 211 | 3.81              |                   | 2.60                 | -0.239 | 0.866 |
|                   | NCO-N          | 195            | 188 | 3.72              |                   | 2.84                 | -0.251 | 2.666 |
| $\Delta$          |                |                |     | 0.77 <sup>d</sup> | 0.01 <sup>e</sup> | -0.05 <sup>f</sup>   |        |       |

a) From TD DFT and GIAO computations using CH<sub>3</sub>CN-optimized structures. b) Note the calculated values of  $\log \epsilon$  for the separate CHI<sub>3</sub>, CHBr<sub>3</sub> and CHCl<sub>3</sub> molecules are 3.45, 3.08 and 2.81, respectively. c) Experimental values (Table S1) d)  $\Delta = 1/n(\Sigma (\log \epsilon_{XB} - \log \epsilon_o))$  where  $\epsilon_{XB}$  and  $\epsilon_o$  are extinction coefficients of the XB complex and the separate molecule, respectively. e)  $\Delta = 1/n(\Sigma (\log \epsilon_{XB} - \log \epsilon(\text{exp})))$ . f)  $\Delta = 1/n(\Sigma (\log \epsilon_{HB} - \log \epsilon_o))$ , where  $\epsilon_{HB}$  and  $\epsilon_o$  are extinction coefficients of the HB complex and the separate molecule, respectively.

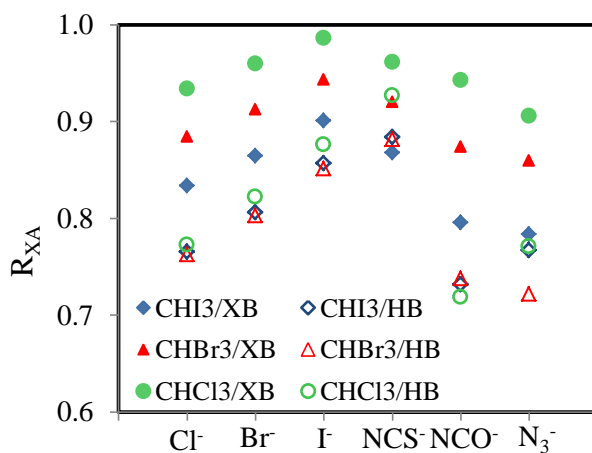

**Figure S21.** Normalized X...A and H...A separations in the calculated XB or HB complexes (as indicated). ( $R_{XA} = d_{XA}/(R_X + R_A)$ , where  $d_{XA}$  are H...A or X...A separation, and  $R_X$  and  $R_A$  are van der Waals radii)

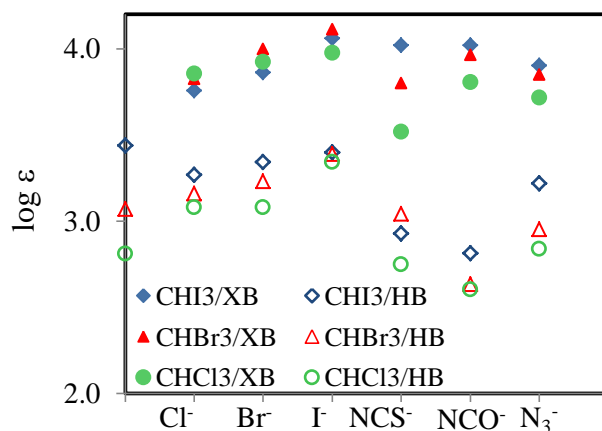

**Figure S22.** Calculated extinction coefficient of the XB and HB complexes  $\text{CHX}_3 \cdot \text{A}^-$  (as indicated). The symbols on the y-axis show values for the separate  $\text{CHX}_3$  molecules, for comparison.

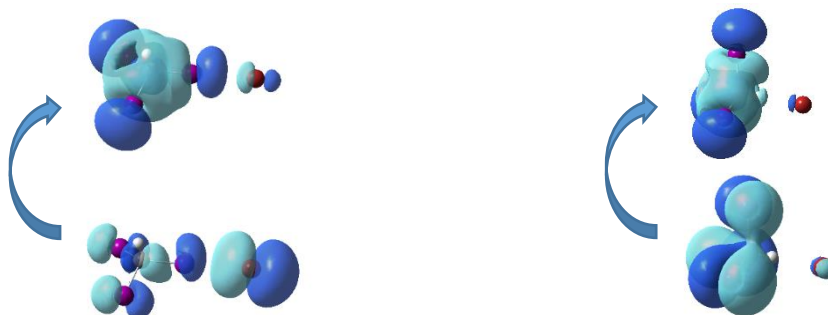

**Figure S23.** Main components of the most intense ground – excited state transition resulted from the TD DFT computations of the XB (left) and HB (right) complexes between  $\text{CHI}_3$  and  $\text{Br}^-$

Atomic coordinates of the XB and HB complexes [CHX<sub>3</sub>, A<sup>-</sup>] (M06-2X/def-TZVPP, CH<sub>3</sub>CN).

CHI<sub>3</sub>-Cl (XB)

|    |             |             |             |
|----|-------------|-------------|-------------|
| I  | 1.50226100  | -1.77178500 | -0.08682800 |
| I  | 1.50329000  | 1.77122400  | -0.08690500 |
| I  | -1.58404400 | 0.00052400  | 0.17993700  |
| C  | 0.52018500  | 0.00003700  | 0.59788300  |
| H  | 0.64478300  | 0.00003700  | 1.67142200  |
| Cl | -4.65328300 | 0.00010200  | -0.32867500 |

CHI<sub>3</sub>-Br (XB)

|    |             |             |             |
|----|-------------|-------------|-------------|
| I  | -1.94827200 | 1.77169900  | -0.10883000 |
| I  | -1.94836900 | -1.77163600 | -0.10884500 |
| I  | 1.12309900  | -0.00006800 | 0.25483200  |
| C  | -0.99209800 | -0.00000200 | 0.60766900  |
| H  | -1.14496400 | 0.00000100  | 1.67746400  |
| Br | 4.40272300  | 0.00000900  | -0.20836600 |

CHI<sub>3</sub>-I (XB)

|   |             |             |             |
|---|-------------|-------------|-------------|
| I | -2.36733600 | 1.77178000  | -0.12005300 |
| I | -2.36679100 | -1.77209500 | -0.11998100 |
| I | 0.69610200  | 0.00031500  | 0.28571300  |
| C | -1.42390700 | -0.00000500 | 0.60912900  |
| H | -1.58583700 | -0.00000600 | 1.67753500  |
| I | 4.22914400  | 0.00000000  | -0.14628900 |

CHI<sub>3</sub>-N<sub>3</sub> (XB)

|   |             |             |             |
|---|-------------|-------------|-------------|
| C | -0.69981300 | -0.00117800 | -0.64278600 |
| N | 4.45963200  | 0.00120700  | 0.71802900  |
| N | 4.21545300  | -0.03931200 | -0.43188700 |
| N | 4.69472700  | 0.04133500  | 1.85194400  |
| H | -0.99453700 | -0.00314800 | -1.68279100 |
| I | 1.45116600  | -0.02041400 | -0.56147700 |
| I | -1.54355300 | 1.78119800  | 0.18390300  |
| I | -1.57544900 | -1.76101800 | 0.19970400  |

CHI<sub>3</sub>-NCS S-(XB)

|   |             |             |             |
|---|-------------|-------------|-------------|
| C | 0.79134700  | -0.00965600 | 0.56418200  |
| N | -5.11769200 | -0.21122100 | 1.74553400  |
| H | 0.77127300  | -0.02680800 | 1.64448700  |
| S | -4.40898200 | 0.12782100  | -0.96703700 |
| C | -4.82770900 | -0.07136200 | 0.62736700  |
| I | -1.24171600 | 0.05067800  | -0.11391700 |
| I | 1.80375100  | -1.79667000 | -0.02312900 |
| I | 1.88729400  | 1.74497900  | 0.03251900  |

CHI<sub>3</sub>-NCS N-(XB)

|   |             |             |             |
|---|-------------|-------------|-------------|
| C | 1.04731900  | 0.00582500  | 0.59896400  |
| N | -3.92174100 | -0.40879800 | -0.20691200 |
| H | 1.19286700  | 0.00935100  | 1.66962800  |
| C | -5.06277400 | -0.17037300 | -0.19415900 |
| S | -6.68070700 | 0.16370800  | -0.17905400 |
| I | -1.04477800 | -0.18957000 | 0.22634300  |
| I | 1.83428800  | 1.86869000  | -0.09418500 |
| I | 2.17734500  | -1.65609800 | -0.12810500 |

CHI<sub>3</sub>-Cl (HB)

|    |             |             |             |
|----|-------------|-------------|-------------|
| I  | -0.57185500 | 1.96603700  | -0.39233200 |
| C  | 0.00035200  | -0.00044400 | 0.19429500  |
| H  | 0.00374200  | -0.00081100 | 1.28386400  |
| I  | 1.98671000  | -0.48912900 | -0.40000500 |
| I  | -1.41949200 | -1.47662000 | -0.39042000 |
| Cl | 0.01411200  | -0.00069300 | 3.54332300  |

CHI<sub>3</sub>-Br (HB)

|    |             |             |             |
|----|-------------|-------------|-------------|
| I  | 0.97407000  | 0.20214200  | 1.96622700  |
| C  | 0.16003300  | 0.00058900  | 0.00892800  |
| H  | -0.92044400 | 0.01348200  | 0.12711700  |
| I  | 0.62918800  | -1.87321100 | -0.88927900 |
| I  | 0.62630400  | 1.65464600  | -1.24946400 |
| Br | -3.37733100 | 0.02438500  | 0.25607600  |

CHI<sub>3</sub>-I (HB)

|   |             |             |             |
|---|-------------|-------------|-------------|
| I | 1.79443300  | -0.00620600 | 1.74589600  |
| C | 0.51120700  | -0.00014500 | 0.04492500  |
| H | -0.50867600 | 0.00031500  | 0.41667700  |
| I | 0.69313500  | -1.76952400 | -1.12716700 |
| I | -3.23352800 | 0.00031600  | 0.48572900  |
| I | 0.69768500  | 1.77542500  | -1.11740600 |

CHI<sub>3</sub>-N<sub>3</sub> (HB)

|   |             |             |             |
|---|-------------|-------------|-------------|
| C | -0.16149000 | -0.00014000 | 0.29335200  |
| N | 2.93676300  | -0.00012600 | 1.78845900  |
| N | 2.00815200  | -0.00097600 | 2.50293000  |
| N | 3.86085600  | 0.00060100  | 1.08085500  |
| H | 0.28636500  | 0.00002600  | 1.28350600  |
| I | 0.56559200  | -1.76988600 | -0.64309300 |
| I | 0.56507300  | 1.77027300  | -0.64271000 |
| I | -2.28081300 | -0.00030600 | 0.51883400  |

CHI<sub>3</sub>-NCS S-(HB)

|   |             |             |             |
|---|-------------|-------------|-------------|
| C | -0.11145700 | -0.00868800 | -0.10747000 |
| N | 2.93578200  | 1.53013900  | -1.28069800 |
| S | 2.83646600  | -1.22651200 | -1.87997700 |
| C | 2.91266700  | 0.39326100  | -1.53423700 |
| H | 0.64761400  | -0.12117000 | -0.87010000 |
| I | 0.92563400  | -0.09004900 | 1.75095800  |
| I | -1.05569800 | 1.87083400  | -0.44154900 |
| I | -1.44331000 | -1.65386100 | -0.37044900 |

CHI<sub>3</sub>-NCS N-(HB)

|   |             |             |             |
|---|-------------|-------------|-------------|
| C | 0.28230200  | -0.00009800 | -0.10347000 |
| N | -2.64307800 | 0.00393100  | -1.25065400 |
| C | -3.79430400 | 0.00204700  | -1.06581200 |
| S | -5.42668400 | -0.00268900 | -0.80754600 |
| H | -0.67309900 | -0.00141700 | -0.61859600 |
| I | -0.19376700 | -0.01061600 | 1.97276900  |
| I | 1.29058500  | 1.77893900  | -0.70176700 |
| I | 1.30079600  | -1.76822400 | -0.71799000 |



CHI<sub>3</sub>-NCO O-(XB)

|   |             |             |             |
|---|-------------|-------------|-------------|
| C | -0.58360900 | 0.00001000  | 0.56458100  |
| H | -0.56778100 | -0.00000500 | 1.64488900  |
| C | 4.88089700  | 0.00004300  | 0.07895500  |
| O | 4.16154400  | -0.00020500 | -0.90932200 |
| N | 5.56977100  | 0.00022800  | 1.03322800  |
| I | 1.44077200  | 0.00023100  | -0.11252300 |
| I | -1.63994600 | -1.77127100 | 0.00472200  |
| I | -1.64038600 | 1.77103600  | 0.00470400  |

CHI<sub>3</sub>-NCO N-(XB)

|   |             |             |             |
|---|-------------|-------------|-------------|
| C | -0.60434800 | -0.00469600 | 0.56770400  |
| N | 4.12118800  | 0.14529500  | -0.91186000 |
| H | -0.60603600 | -0.01186700 | 1.64842800  |
| C | 4.92049500  | 0.01599800  | -0.04824700 |
| O | 5.73855800  | -0.11525000 | 0.83215700  |
| I | 1.43402000  | 0.05709700  | -0.09590000 |
| I | -1.61283000 | -1.80051400 | -0.01038900 |
| I | -1.70888200 | 1.74056800  | 0.01120500  |

CHBr<sub>3</sub>-Cl (XB)

|    |             |             |             |
|----|-------------|-------------|-------------|
| C  | 0.71580800  | -0.00007700 | 0.56512000  |
| H  | 0.86674800  | -0.00022800 | 1.63431200  |
| Br | -1.18299600 | 0.00004100  | 0.22106000  |
| Br | 1.56983300  | 1.59414500  | -0.12071000 |
| Br | 1.56969900  | -1.59418600 | -0.12114300 |
| Cl | -4.33178600 | 0.00004100  | -0.25278000 |

CHBr<sub>3</sub>-Br (XB)

|    |             |             |             |
|----|-------------|-------------|-------------|
| C  | 1.30510400  | -0.00000100 | 0.56626300  |
| H  | 1.46999800  | 0.00000800  | 1.63336600  |
| Br | -0.60027600 | -0.00002100 | 0.25594300  |
| Br | 2.14544600  | 1.59415600  | -0.13298700 |
| Br | 2.14548300  | -1.59413500 | -0.13299200 |
| Br | -3.95638600 | 0.00000000  | -0.13370600 |

CHBr<sub>3</sub>-I (XB)

|    |             |             |             |
|----|-------------|-------------|-------------|
| C  | -1.81940000 | 0.00000100  | 0.56551400  |
| H  | -1.98891400 | 0.00000900  | 1.63185000  |
| Br | 0.08958800  | 0.00000300  | 0.27000800  |
| Br | -2.65216500 | -1.59421500 | -0.13959300 |
| Br | -2.65217900 | 1.59420900  | -0.13959400 |
| I  | 3.68720300  | 0.00000100  | -0.08874900 |

CHBr<sub>3</sub>-N<sub>3</sub> (XB)

|    |             |             |             |
|----|-------------|-------------|-------------|
| Br | 1.00979200  | 0.20184000  | -0.65736200 |
| Br | -1.45341700 | -1.68090600 | 0.12427300  |
| Br | -1.73829800 | 1.48603800  | 0.35572200  |
| C  | -0.91182000 | 0.02578800  | -0.60549800 |
| N  | 3.96173400  | -0.02259600 | 0.54776000  |
| N  | 3.92715700  | 0.37434800  | -0.55337000 |
| N  | 3.98561600  | -0.41819600 | 1.64265300  |
| H  | -1.28334800 | 0.06639400  | -1.61845600 |

CHI<sub>3</sub>-NCO O-(HB)

|   |             |             |             |
|---|-------------|-------------|-------------|
| C | -0.08455300 | -0.00376100 | 0.20621800  |
| C | 3.15588600  | 0.16368800  | 2.08318200  |
| O | 2.04324900  | 0.61532300  | 2.30256500  |
| N | 4.23078800  | -0.27138400 | 1.87570000  |
| H | 0.52631800  | 0.05460000  | 1.10049900  |
| I | 1.28695800  | -0.38274000 | -1.37994700 |
| I | -1.03205800 | 1.89653600  | 0.02525200  |
| I | -1.47972700 | -1.58996700 | 0.47946200  |

CHI<sub>3</sub>-NCO N-(HB)

|   |             |             |             |
|---|-------------|-------------|-------------|
| C | -0.10761900 | 0.00120800  | -0.22079400 |
| N | 1.95669900  | -0.20531100 | -2.49383900 |
| C | 3.05449000  | -0.06248400 | -2.07773400 |
| O | 4.18258400  | 0.08293600  | -1.65933000 |
| H | 0.47849000  | -0.02025700 | -1.13911400 |
| I | -1.65961200 | 1.43647200  | -0.48271000 |
| I | 1.28053600  | 0.56208500  | 1.29535500  |
| I | -0.85332600 | -1.97664000 | 0.04889800  |

CHBr<sub>3</sub>-Cl (HB)

|    |             |             |             |
|----|-------------|-------------|-------------|
| C  | 0.01906700  | -0.00058500 | -0.01172400 |
| Br | -0.52270700 | 1.82838300  | 0.28095600  |
| Br | -0.43019500 | -1.12096000 | 1.49413300  |
| Cl | 3.35131800  | -0.01428800 | -0.23481700 |
| Br | -0.70970800 | -0.70020100 | -1.65597900 |
| H  | 1.10456100  | -0.00638100 | -0.10665500 |

CHBr<sub>3</sub>-Br (HB)

|    |             |             |             |
|----|-------------|-------------|-------------|
| C  | 0.44006700  | -0.00039800 | -0.00977100 |
| Br | 0.96024600  | 1.71075500  | 0.71390900  |
| Br | 1.13320700  | -0.25739000 | -1.79171300 |
| Br | -3.09360700 | -0.00481700 | -0.08026900 |
| H  | -0.64511100 | -0.00412400 | -0.07618900 |
| Br | 0.94314700  | -1.44836200 | 1.16192500  |

CHBr<sub>3</sub>-I (HB)

|    |             |             |             |
|----|-------------|-------------|-------------|
| C  | -0.86129200 | 0.00012400  | 0.04425500  |
| Br | -1.18425100 | -1.60353700 | -0.97800000 |
| Br | -1.19055700 | 1.58540000  | -1.00393600 |
| I  | 2.90004300  | 0.00307700  | 0.18484000  |
| Br | -1.87456600 | 0.01333700  | 1.68587700  |
| H  | 0.19356100  | 0.00416600  | 0.30003300  |

CHBr<sub>3</sub>-N<sub>3</sub> (HB)

|    |             |             |             |
|----|-------------|-------------|-------------|
| Br | -0.36774800 | -1.46989400 | 1.18701700  |
| Br | -0.43858800 | 1.69564900  | 0.82676300  |
| C  | -0.14399000 | -0.00234900 | -0.05496300 |
| N  | 3.55767500  | -0.03876500 | -0.68733700 |
| N  | 2.48918800  | -0.09086500 | -1.18248500 |
| N  | 4.61485700  | 0.01072300  | -0.21945300 |
| H  | 0.90753500  | -0.02400200 | -0.43255500 |
| Br | -1.32725400 | -0.20088600 | -1.57414400 |

CHBr<sub>3</sub>-NCS S-(XB)

|    |             |             |             |
|----|-------------|-------------|-------------|
| Br | 0.76626000  | -0.00088500 | -0.12713100 |
| Br | -2.00093900 | 1.59455600  | -0.00890600 |
| Br | -2.00248300 | -1.59367000 | -0.00801800 |
| C  | -1.05039800 | 0.00015400  | 0.52713200  |
| N  | 4.42077400  | 0.00190000  | 1.78876000  |
| H  | -1.01491200 | 0.00037800  | 1.60620900  |
| S  | 4.00945700  | -0.00115500 | -1.00413000 |
| C  | 4.25353600  | 0.00064100  | 0.63627700  |

CHBr<sub>3</sub>-NCS N-(XB)

|    |             |             |             |
|----|-------------|-------------|-------------|
| Br | -0.50576800 | -0.00029200 | 0.11502200  |
| Br | 2.25333000  | -1.59390700 | -0.08129400 |
| Br | 2.25276700  | 1.59425400  | -0.08131900 |
| C  | 1.36708100  | 0.00003900  | 0.56072500  |
| N  | -3.41199300 | -0.00063000 | -0.52882700 |
| H  | 1.46008700  | 0.00004300  | 1.63637800  |
| C  | -4.54592400 | -0.00031500 | -0.25877700 |
| S  | -6.15716200 | 0.00025600  | 0.11996300  |

CHBr<sub>3</sub>-NCO O-(XB)

|    |             |             |             |
|----|-------------|-------------|-------------|
| Br | 1.00097800  | 0.36177900  | 0.01692600  |
| Br | -2.03039600 | 1.36284800  | 0.01112200  |
| Br | -1.38480500 | -1.75651800 | -0.12189900 |
| C  | -0.80792200 | -0.03653700 | 0.54498500  |
| H  | -0.84083200 | -0.08888500 | 1.62283300  |
| C  | 4.33002300  | 0.01711700  | -0.04058500 |
| O  | 3.74930400  | 0.89147100  | -0.66102500 |
| N  | 4.88737000  | -0.83002300 | 0.56053900  |

CHBr<sub>3</sub>-NCO N-(XB)

|    |             |             |             |
|----|-------------|-------------|-------------|
| Br | 1.02760500  | -0.07020900 | -0.15601500 |
| Br | -1.67735100 | 1.62922100  | -0.02322400 |
| Br | -1.79856400 | -1.55587400 | 0.03019300  |
| C  | -0.77483700 | 0.00870300  | 0.52447500  |
| N  | 3.83990400  | -0.17046900 | -1.11377200 |
| H  | -0.72874600 | 0.02479500  | 1.60303600  |
| C  | 4.31248200  | -0.01784900 | -0.04116300 |
| O  | 4.78929800  | 0.13919000  | 1.06376400  |

CHCl<sub>3</sub>--Cl (XB)

|    |             |             |             |
|----|-------------|-------------|-------------|
| C  | 1.18816600  | -0.00000300 | 0.49801900  |
| H  | 1.38388400  | 0.00000600  | 1.56113900  |
| Cl | -3.80202300 | -0.00000200 | -0.13753300 |
| Cl | -0.55394600 | 0.00028700  | 0.24505200  |
| Cl | 1.92784800  | 1.45135200  | -0.18760400 |
| Cl | 1.92736400  | -1.45163700 | -0.18751900 |

CHCl<sub>3</sub>-Br (XB)

|    |             |             |             |
|----|-------------|-------------|-------------|
| C  | 2.00120400  | -0.00000500 | 0.49716800  |
| H  | 2.20274900  | -0.00002200 | 1.55919000  |
| Br | -3.18577300 | 0.00000500  | -0.06706500 |
| Cl | 2.73342300  | 1.45151900  | -0.19369500 |
| Cl | 0.25587200  | -0.00022700 | 0.25834800  |
| Cl | 2.73376900  | -1.45130000 | -0.19376700 |

CHBr<sub>3</sub>-NCS S-(HB)

|    |             |             |             |
|----|-------------|-------------|-------------|
| Br | -1.25438100 | -1.51134900 | 0.78456300  |
| Br | -1.25520100 | 1.66126300  | 0.44275200  |
| C  | -0.31214500 | 0.01691000  | 0.08086300  |
| N  | 2.81508300  | -1.74905800 | 0.49881800  |
| S  | 3.10087100  | 1.04836000  | 0.74310600  |
| C  | 2.95279600  | -0.59658700 | 0.59984900  |
| Br | 0.05798700  | -0.18236800 | -1.80018600 |
| H  | 0.64239900  | 0.08360900  | 0.58476000  |

CHBr<sub>3</sub>-NCS N-(HB)

|    |             |             |             |
|----|-------------|-------------|-------------|
| Br | -1.91149000 | 0.26771000  | 1.50718700  |
| Br | -0.64544700 | 1.44679000  | -1.17259500 |
| C  | -0.61291900 | 0.00122700  | 0.10502500  |
| N  | 2.44773500  | -0.05081500 | 0.74617900  |
| C  | 3.59952800  | -0.02288700 | 0.56918100  |
| S  | 5.23305100  | 0.01558800  | 0.32067800  |
| Br | -0.84764000 | -1.70761300 | -0.76164500 |
| H  | 0.37761100  | -0.00482100 | 0.54752100  |

CHBr<sub>3</sub>-NCO O-(HB)

|    |             |             |             |
|----|-------------|-------------|-------------|
| Br | -1.50986000 | 1.30808400  | -0.77573800 |
| Br | -1.04729600 | -1.74245800 | 0.03145100  |
| C  | -0.23542500 | -0.00145700 | -0.15679800 |
| C  | 3.33618600  | -0.17157300 | -1.11271000 |
| O  | 2.33791500  | -0.66664700 | -1.61181200 |
| N  | 4.30067800  | 0.30533100  | -0.63353900 |
| Br | 0.61524100  | 0.55808700  | 1.48257100  |
| H  | 0.55437300  | -0.09592800 | -0.89364300 |

CHBr<sub>3</sub>-NCO N-(HB)

|    |             |             |             |
|----|-------------|-------------|-------------|
| C  | -0.17842400 | -0.00140100 | -0.01014900 |
| N  | 2.66441300  | -0.01245200 | -0.14806800 |
| C  | 3.84469500  | -0.01116900 | -0.10229600 |
| O  | 5.05312400  | -0.00977700 | -0.05809800 |
| H  | 0.93767200  | -0.00775200 | -0.06754800 |
| Br | -0.68802800 | -0.30143900 | 1.83243800  |
| Br | -0.80420900 | 1.72486700  | -0.62170300 |
| Br | -0.85094000 | -1.41632600 | -1.14663600 |

CHCl<sub>3</sub>-Cl (HB)

|    |             |             |             |
|----|-------------|-------------|-------------|
| C  | 0.40176800  | -0.00035100 | -0.00294000 |
| Cl | -2.96621800 | -0.00322700 | -0.01792600 |
| Cl | 0.93666700  | -1.10783700 | 1.26450100  |
| Cl | 0.94414500  | 1.64530400  | 0.33793600  |
| H  | -0.68767600 | -0.00354300 | -0.02029800 |
| Cl | 0.98405800  | -0.53390800 | -1.58228000 |

CHCl<sub>3</sub>-Br (HB)

|    |             |             |             |
|----|-------------|-------------|-------------|
| C  | 1.05830000  | -0.00043700 | -0.04504100 |
| Br | -2.50273100 | -0.00048600 | -0.11247600 |
| Cl | 1.99565100  | -0.07345600 | -1.53861900 |
| Cl | 1.37788200  | -1.41287600 | 0.96379000  |
| Cl | 1.40567100  | 1.48756500  | 0.83932600  |
| H  | -0.00070100 | -0.00131200 | -0.28953800 |

CHCl<sub>3</sub>-I (XB)

|    |             |             |             |
|----|-------------|-------------|-------------|
| C  | 2.63006900  | 0.00000600  | 0.49640200  |
| H  | 2.83909900  | -0.00000200 | 1.55696500  |
| I  | -2.78600600 | -0.00000100 | -0.04438400 |
| Cl | 3.35434100  | -1.45150700 | -0.20071500 |
| Cl | 3.35491200  | 1.45116800  | -0.20082700 |
| Cl | 0.88126500  | 0.00033900  | 0.27313000  |

CHCl<sub>3</sub>-N<sub>3</sub> (XB)

|    |             |             |             |
|----|-------------|-------------|-------------|
| C  | -1.39365200 | -0.08293000 | -0.51425100 |
| N  | 3.33388000  | 0.04224400  | 0.26543600  |
| N  | 3.32387900  | -0.55562400 | -0.73943700 |
| N  | 3.33608300  | 0.63900200  | 1.26749400  |
| H  | -1.85109900 | -0.23608600 | -1.48159100 |
| Cl | 0.34384600  | -0.31866500 | -0.66881000 |
| Cl | -1.76391700 | 1.56551400  | 0.00378500  |
| Cl | -2.09427500 | -1.25541800 | 0.60694600  |

CHCl<sub>3</sub>-NCS S-(XB)

|    |             |             |             |
|----|-------------|-------------|-------------|
| C  | -1.65575700 | 0.14786700  | 0.43863500  |
| N  | 3.40165700  | 1.11108800  | 1.41255100  |
| H  | -1.63704700 | 0.49130300  | 1.46336100  |
| S  | 3.30323600  | -0.63756900 | -0.80091700 |
| C  | 3.36334500  | 0.38970800  | 0.49859900  |
| Cl | -0.00212900 | -0.19213200 | -0.06630000 |
| Cl | -2.36541200 | 1.42720700  | -0.55042800 |
| Cl | -2.64845100 | -1.31114900 | 0.37202500  |

CHCl<sub>3</sub>-NCS N-(XB)

|    |             |             |             |
|----|-------------|-------------|-------------|
| C  | 1.66580900  | 0.14692100  | 0.46099700  |
| N  | -2.73167700 | -1.54278600 | -0.83359300 |
| H  | 1.61604100  | 0.40289200  | 1.50997100  |
| C  | -3.16215100 | -0.59453000 | -0.30975600 |
| S  | -3.76105200 | 0.75597700  | 0.43825700  |
| Cl | 0.08703700  | -0.44386900 | -0.04469200 |
| Cl | 2.89946600  | -1.10176500 | 0.26557600  |
| Cl | 2.11117800  | 1.60367000  | -0.43231900 |

CHCl<sub>3</sub>-NCO O-(XB)

|    |             |             |             |
|----|-------------|-------------|-------------|
| C  | -1.30391000 | 0.07269100  | 0.48173900  |
| H  | -1.35951100 | 0.18957000  | 1.55484300  |
| C  | 3.58740600  | -0.00811800 | -0.03147500 |
| O  | 3.14421500  | -1.04059300 | -0.50109000 |
| N  | 4.01407400  | 0.99318000  | 0.42362700  |
| Cl | 0.34018400  | -0.38085200 | 0.05119400  |
| Cl | -2.45037800 | -1.18811100 | 0.01455500  |
| Cl | -1.74825800 | 1.61575600  | -0.25475500 |

CHCl<sub>3</sub>-NCO N-(XB)

|    |             |             |             |
|----|-------------|-------------|-------------|
| C  | -1.25914000 | 0.04559500  | 0.46023000  |
| N  | 3.31321800  | -0.40102700 | -1.15906400 |
| H  | -1.20166400 | 0.14671700  | 1.53485400  |
| C  | 3.55971800  | -0.03181100 | -0.06470100 |
| O  | 3.80597100  | 0.34868200  | 1.06316300  |
| Cl | 0.37126300  | -0.14594900 | -0.17392000 |
| Cl | -2.01856100 | 1.50675600  | -0.18094200 |
| Cl | -2.24929600 | -1.37326000 | 0.10192700  |

CHCl<sub>3</sub>-I (HB)

|    |             |             |             |
|----|-------------|-------------|-------------|
| C  | 1.58084800  | -0.00000100 | 0.07530300  |
| I  | -2.20297900 | 0.00000000  | 0.10240400  |
| Cl | 1.78840500  | -1.45127100 | -0.90570900 |
| Cl | 1.78836700  | 1.45120800  | -0.90581100 |
| Cl | 2.70027600  | 0.00006300  | 1.43913200  |
| H  | 0.56299700  | -0.00000100 | 0.45136600  |

CHCl<sub>3</sub>-N<sub>3</sub> (HB)

|    |             |             |             |
|----|-------------|-------------|-------------|
| C  | 0.66148500  | -0.00060600 | -0.15998500 |
| N  | -2.65926000 | -0.00293700 | -0.54207500 |
| N  | -2.09724400 | -0.01222200 | -1.57035300 |
| N  | -3.21731600 | 0.00626100  | 0.47911800  |
| H  | -0.06342300 | -0.00444400 | -0.96957300 |
| Cl | 0.37618200  | -1.44685300 | 0.81128100  |
| Cl | 0.37862000  | 1.45643100  | 0.79595700  |
| Cl | 2.29880100  | -0.00544000 | -0.82120000 |

CHCl<sub>3</sub>-NCS S-(HB)

|    |             |             |             |
|----|-------------|-------------|-------------|
| C  | -0.84222500 | 0.00687800  | -0.00186700 |
| N  | 2.22254500  | 1.97631600  | -0.01108300 |
| S  | 2.78103000  | -0.78952100 | -0.00368300 |
| C  | 2.47717100  | 0.83884500  | -0.00795100 |
| H  | 0.20723200  | 0.26767400  | -0.01254200 |
| Cl | -1.78669200 | 1.49676400  | -0.02950900 |
| Cl | -1.17527100 | -0.97264500 | -1.43027100 |
| Cl | -1.15987200 | -0.90905400 | 1.47201300  |

CHCl<sub>3</sub>-NCS N-(HB)

|    |             |             |             |
|----|-------------|-------------|-------------|
| C  | -1.33495900 | 0.00013400  | -0.04451400 |
| N  | 1.80950200  | 0.02527500  | -0.43251600 |
| C  | 2.95236500  | 0.01163300  | -0.24742000 |
| S  | 4.58372000  | -0.00536100 | 0.01424800  |
| H  | -0.28178600 | 0.00742600  | -0.30632500 |
| Cl | -1.98397300 | -1.60736500 | -0.37943500 |
| Cl | -1.46240300 | 0.37620800  | 1.67631700  |
| Cl | -2.16707600 | 1.22120500  | -1.01114200 |

CHCl<sub>3</sub>-NCO O-(HB)

|    |             |             |             |
|----|-------------|-------------|-------------|
| C  | 0.68612700  | -0.01618100 | -0.09212400 |
| C  | -3.00655700 | -0.20564600 | -0.39507300 |
| O  | -2.11902100 | -0.84436100 | -0.93813600 |
| N  | -3.86425100 | 0.40899200  | 0.12828000  |
| H  | -0.21627100 | -0.26260400 | -0.64189100 |
| Cl | 0.22346700  | 1.07184300  | 1.21998900  |
| Cl | 1.83868100  | 0.76731900  | -1.17514700 |
| Cl | 1.35789800  | -1.51648400 | 0.55352300  |

CHCl<sub>3</sub>-NCO N-(HB)

|    |             |             |             |
|----|-------------|-------------|-------------|
| C  | 0.78028000  | -0.00951900 | -0.03246600 |
| N  | -2.22781700 | -0.27496000 | -0.55423900 |
| C  | -3.35020400 | -0.10055700 | -0.22964300 |
| O  | -4.50272400 | 0.07622200  | 0.10091400  |
| Cl | 1.35103900  | -1.55984400 | 0.59447000  |
| Cl | 1.66361600  | 0.42975100  | -1.49824400 |
| Cl | 0.94497500  | 1.25263300  | 1.19330000  |
| H  | -0.27765200 | -0.10778600 | -0.27692700 |

## X-ray Structural Analysis

Co-crystals of  $\text{CHI}_3$  with  $\text{Bu}_4\text{NI}$ ,  $\text{Pr}_4\text{NBr}$  or  $\text{Pr}_4\text{NCl}$  were crystallized by diffusion of hexane into dichloromethane solutions containing 1:1 mixtures of the  $\text{CHI}_3$  and alkylammonium salt of halide at low temperatures ( $-30^\circ$ ). Intensity data for X-ray crystallographic analysis were collected at 173 K with a Bruker SMART Apex or Bruker AXS D8 Quest CMOS diffractometer using  $\text{Mo K}\alpha$  radiation ( $\lambda = 0.71073 \text{ \AA}$ ). The structures were solved by direct methods and refined by full matrix least-squares treatment. Intermolecular contacts were analyzed using the OLEX2 structure solution, refinement and analysis program. Crystallographic, data collection and structure refinement details, as well as geometric characteristics of the halogen bonds in these crystals are presented in Table S5. Complete crystallographic data, in CIF format, have been deposited with the Cambridge Crystallographic Data Centre. CCDC 1837582, 1837583 and 1837584 contain the supplementary crystallographic data for this paper. These data can be obtained free of charge via [www.ccdc.cam.ac.uk/data\\_request/cif](http://www.ccdc.cam.ac.uk/data_request/cif).

**Table S6.** Crystallographic, data collection and structure refinement details

|                                                                      | $\text{CHI}_3 \cdot \text{Br}$                                          | $\text{CHI}_3 \cdot \text{Cl}$                                          | $\text{CHI}_3 \cdot \text{I}$                                          |
|----------------------------------------------------------------------|-------------------------------------------------------------------------|-------------------------------------------------------------------------|------------------------------------------------------------------------|
| Chemical formula                                                     | $\text{C}_{12}\text{H}_{28}\text{N} \cdot \text{CHI}_3 \cdot \text{Br}$ | $\text{C}_{12}\text{H}_{28}\text{N} \cdot \text{CHI}_3 \cdot \text{Cl}$ | $\text{C}_{16}\text{H}_{36}\text{N} \cdot \text{CHI}_3 \cdot \text{I}$ |
| $M_r$                                                                | 659.98                                                                  | 615.52                                                                  | 763.07                                                                 |
| Crystal system, space group                                          | Monoclinic, $Pn$                                                        | Monoclinic, $Pn$                                                        | Orthorhombic, $Pbca$                                                   |
| Temperature (K)                                                      | 100                                                                     | 100                                                                     | 100                                                                    |
| $a, b, c$ ( $\text{\AA}$ )                                           | 8.7748 (6),<br>8.9163 (7),<br>13.3043 (10)                              | 8.7174 (5),<br>8.8068 (5),<br>13.2169 (7)                               | 15.9191 (6),<br>17.5775 (7),<br>17.8152 (6)                            |
| $\beta$ ( $^\circ$ )                                                 | 98.065 (3)                                                              | 97.763 (3)                                                              |                                                                        |
| $V$ ( $\text{\AA}^3$ )                                               | 1030.62 (13)                                                            | 1005.39 (10)                                                            | 4985.0 (3)                                                             |
| $Z$                                                                  | 2                                                                       | 2                                                                       | 8                                                                      |
| Radiation type                                                       | $\text{Mo K}\alpha$                                                     | $\text{Mo K}\alpha$                                                     | $\text{Mo K}\alpha$                                                    |
| $\mu$ ( $\text{mm}^{-1}$ )                                           | 6.48                                                                    | 4.79                                                                    | 5.00                                                                   |
| Crystal size (mm)                                                    | $0.31 \times 0.26 \times 0.04$                                          | $0.52 \times 0.25 \times 0.07$                                          | $0.53 \times 0.33 \times 0.13$                                         |
| $T_{\min}, T_{\max}$                                                 | 0.429, 0.746                                                            | 0.623, 0.729                                                            | 0.409, 0.747                                                           |
| No. of measured, independent and observed [ $I > 2\sigma(I)$ ] refls | 9213, 5325, 5206                                                        | 24409, 3359, 3228                                                       | 67764, 7607, 6492                                                      |
| $R_{\text{int}}$                                                     | 0.062                                                                   | 0.080                                                                   | 0.039                                                                  |
| $(\sin \theta/\lambda)_{\text{max}}$ ( $\text{\AA}^{-1}$ )           | 0.704                                                                   | 0.602                                                                   | 0.714                                                                  |
| $R[F^2 > 2\sigma(F^2)], wR(F^2), S$                                  | 0.052, 0.134, 1.06                                                      | 0.029, 0.061, 1.08                                                      | 0.035, 0.080, 1.30                                                     |
| No. of reflections                                                   | 5325                                                                    | 3359                                                                    | 7607                                                                   |
| No. of parameters                                                    | 167                                                                     | 167                                                                     | 204                                                                    |
| No. of restraints                                                    | 2                                                                       | 2                                                                       |                                                                        |
| H-atom treatment                                                     | H-atom parameters constrained                                           | H-atom parameters constrained                                           | H-atom parameters constrained                                          |

<sup>1</sup>Diffractometer: Bruker Kappa APEX CCD area detector Absorption correction: Multi-scan SADABS2012/1 (Bruker, 2012) was used for absorption correction.  $wR2(\text{int})$  was 0.1254 before and 0.0869 after correction. The Ratio of minimum to maximum transmission is 0.5746. The  $1/2$  correction factor is 0.0015. Computer programs: APEX2 V2.1-4 (Bruker, 2007), SAINT V7.23A (Bruker, 2005), Bruker SAINT, SHELXT (Sheldrick, 2008), SHELXL (Sheldrick, 2008), Olex2 (Dolomanov *et al.*, 2009). <sup>2</sup>Diffractometer: Bruker Kappa APEX CCD area detector Absorption correction: Multi-scan SADABS2012/1 (Bruker, 2012) was used for absorption correction.  $wR2(\text{int})$  was 0.1182 before and 0.0970 after correction. The Ratio of minimum to maximum transmission is 0.8552. The  $1/2$  correction factor is 0.0015. <sup>3</sup>Diffractometer: Bruker AXS D8 Quest CMOS diffractometer. Absorption correction: Multi-scan SADABS 2016/2: Krause, L., Herbst-Irmer, R., Sheldrick G.M. & Stalke D., J. Appl. Cryst. 48 (2015) 3-10. Computer programs: Apex3 v2016.9-0 (Bruker, 2016), SAINT V8.37A (Bruker, 2016), SHELXS97 (Sheldrick, 2008), SHELXL2016/6 (Sheldrick, 2015, 2016), SHELXL Rev714 (Hübschle *et al.*, 2011).

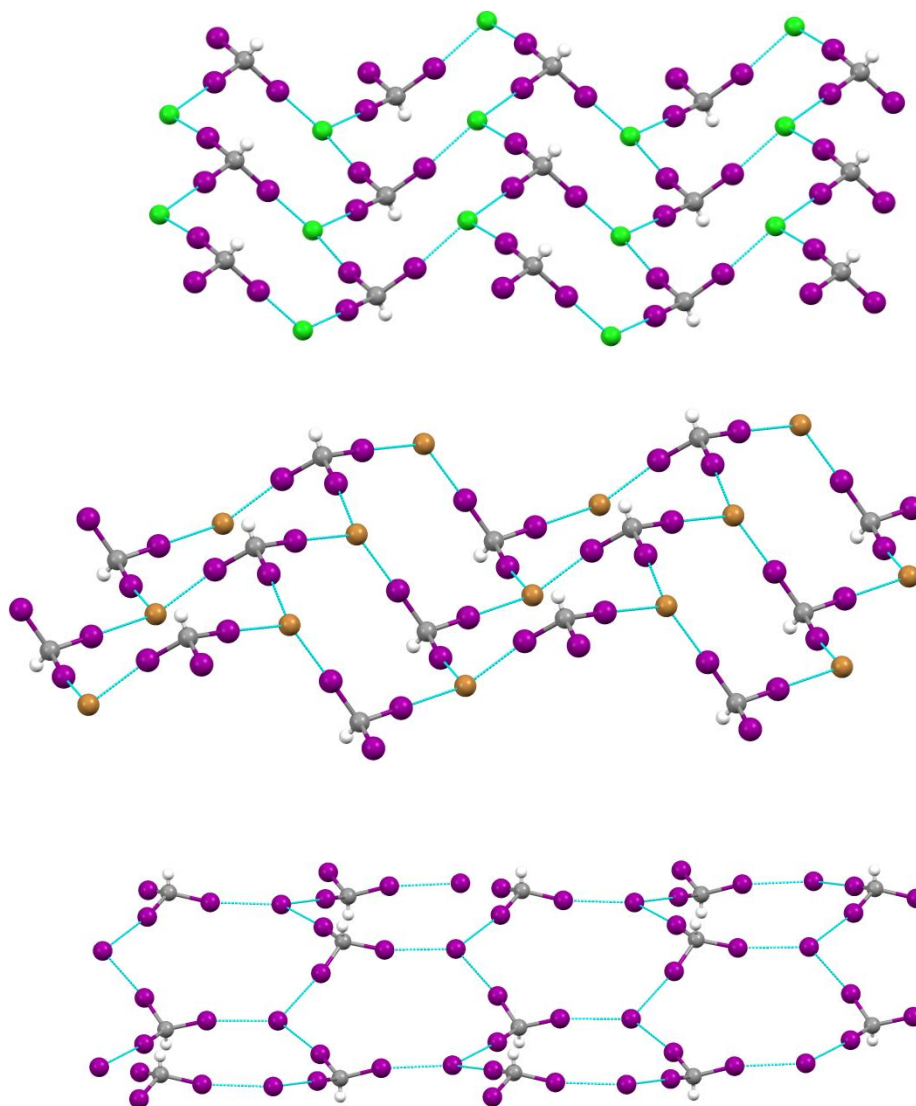

**Figure S24.** Halogen-bonded networks in the co-crystals of  $\text{CHI}_3$  with  $\text{Pr}_4\text{NCl}$  (top),  $\text{Pr}_4\text{NBr}$  (middle) and  $\text{Bu}_4\text{NI}$  (bottom).

**Table S7.** Bond distances ( $\text{I}\cdots\text{X}$ , in Å) and angles ( $\text{C-I-A}$ , in deg) in the halogen-bonded complexes in the solid-state structures in comparison with the calculated structures.

| $\text{A}^-$  | X-ray crystallographic measurements                 |                                             | M06-2X/def-TZVPP computations ( $\text{CH}_3\text{CN}$ ) |                                             |
|---------------|-----------------------------------------------------|---------------------------------------------|----------------------------------------------------------|---------------------------------------------|
|               | $d_{\text{I}\cdots\text{X}}, \text{\AA}^{\text{a}}$ | $\angle\text{C-I-A}, \text{deg}^{\text{a}}$ | $d_{\text{I}\cdots\text{X}}, \text{\AA}^{\text{b}}$      | $\angle\text{C-I-A}, \text{deg}^{\text{b}}$ |
| $\text{I}^-$  | 3.518, 3.541, 3.594                                 | 170.21, 173.14, 166.29                      | 3.551                                                    | 178.3                                       |
| $\text{Br}^-$ | 3.231, 3.243, 3.289                                 | 170.6, 168.46, 177.92                       | 3.254                                                    | 178.6                                       |
| $\text{Cl}^-$ | 3.115, 3.124, 3.179                                 | 171.65, 169.99, 179.17                      | 3.130                                                    | 178.2                                       |
